# Supplementary material for: Synthesis, glycosylation and photolysis of photolabile 2-(2-nitrophenyl)propyloxycarbonyl (NPPOC) protected glycopyranosides
Source: Royal Society of Chemistry journal article supplement (doi:10.1039/b908404e), 2009-01-01

**Supporting Information (SI)**  
**Synthesis, glycosylation and photolysis of photolabile  
2-(2-nitrophenyl)propyloxycarbonyl (NPPOC) protected  
glycopyranosides**

Hua Yi, Stephane Maisonneuve, and Juan Xie\*

*PPSM, ENS Cachan, CNRS, Institut d'Alembert, 61 av President Wilson, F-94230 CACHAN,  
France*

Table of contents

|                                                                |    |
|----------------------------------------------------------------|----|
| <sup>1</sup> H NMR spectra of 2 in CDCl <sub>3</sub> .....     | 3  |
| <sup>13</sup> C NMR spectra of 2 in CDCl <sub>3</sub> .....    | 4  |
| <sup>1</sup> H NMR spectra of 4 in CDCl <sub>3</sub> .....     | 5  |
| <sup>13</sup> C NMR spectra of 4 in CDCl <sub>3</sub> .....    | 6  |
| <sup>1</sup> H NMR spectra of 6 in CDCl <sub>3</sub> .....     | 7  |
| <sup>13</sup> C NMR spectra of 6 in CDCl <sub>3</sub> .....    | 8  |
| <sup>1</sup> H NMR spectra of 8 in CDCl <sub>3</sub> .....     | 9  |
| <sup>13</sup> C NMR spectra of 8 in CDCl <sub>3</sub> .....    | 10 |
| <sup>1</sup> H NMR spectra of 10 in CDCl <sub>3</sub> .....    | 11 |
| <sup>13</sup> C NMR spectra of 10 in CDCl <sub>3</sub> .....   | 12 |
| <sup>1</sup> H NMR spectra of 11 in CDCl <sub>3</sub> .....    | 13 |
| <sup>13</sup> C NMR spectra of 11 in CDCl <sub>3</sub> .....   | 14 |
| <sup>1</sup> H NMR spectra of 12β in CDCl <sub>3</sub> .....   | 15 |
| <sup>13</sup> C NMR spectra of 12β in CDCl <sub>3</sub> .....  | 16 |
| <sup>1</sup> H NMR spectra of 12 α in CDCl <sub>3</sub> .....  | 17 |
| <sup>13</sup> C NMR spectra of 12 α in CDCl <sub>3</sub> ..... | 18 |
| <sup>1</sup> H NMR spectra of 13 in CDCl <sub>3</sub> .....    | 19 |
| <sup>13</sup> C NMR spectra of 13 in CDCl <sub>3</sub> .....   | 20 |
| <sup>1</sup> H NMR spectra of 14 in CDCl <sub>3</sub> .....    | 21 |
| <sup>13</sup> C NMR spectra of 14 in CDCl <sub>3</sub> .....   | 22 |
| <sup>1</sup> H NMR spectra of 15 in CDCl <sub>3</sub> .....    | 23 |
| <sup>13</sup> C NMR spectra of 15 in CDCl <sub>3</sub> .....   | 24 |
| <sup>1</sup> H NMR spectra of 16 in CDCl <sub>3</sub> .....    | 25 |
| <sup>13</sup> C NMR spectra of 16 in CDCl <sub>3</sub> .....   | 26 |
| <sup>1</sup> H NMR spectra of 17 in CDCl <sub>3</sub> .....    | 27 |
| <sup>13</sup> C NMR spectra of 17 in CDCl <sub>3</sub> .....   | 28 |
| <sup>1</sup> H NMR spectra of 18 in CDCl <sub>3</sub> .....    | 29 |
| <sup>13</sup> C NMR spectra of 18 in CDCl <sub>3</sub> .....   | 30 |
| <sup>1</sup> H NMR spectra of 19 in CDCl <sub>3</sub> .....    | 31 |

|                                                            |    |
|------------------------------------------------------------|----|
| $^{13}\text{C}$ NMR spectra of 19 in $\text{CDCl}_3$ ..... | 32 |
| $^1\text{H}$ NMR spectra of 20 in $\text{CDCl}_3$ .....    | 33 |
| $^{13}\text{C}$ NMR spectra of 20 in $\text{CDCl}_3$ ..... | 34 |

### $^1\text{H}$ NMR spectra of 2 in $\text{CDCl}_3$

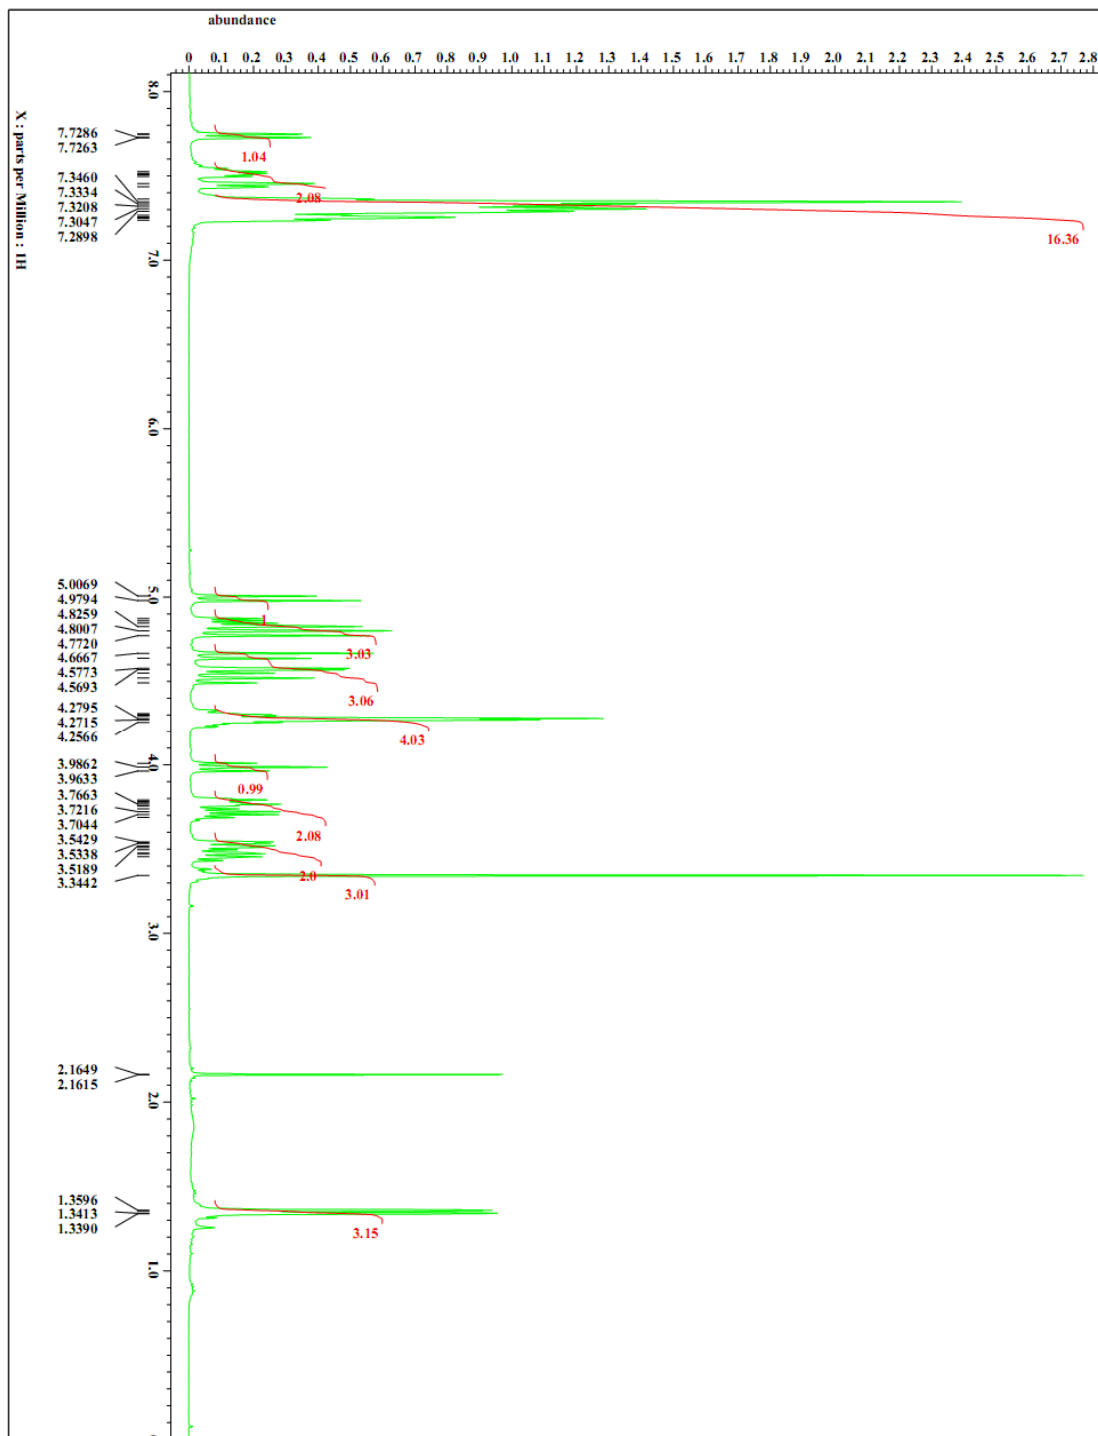

### $^{13}\text{C}$ NMR spectra of **2** in $\text{CDCl}_3$

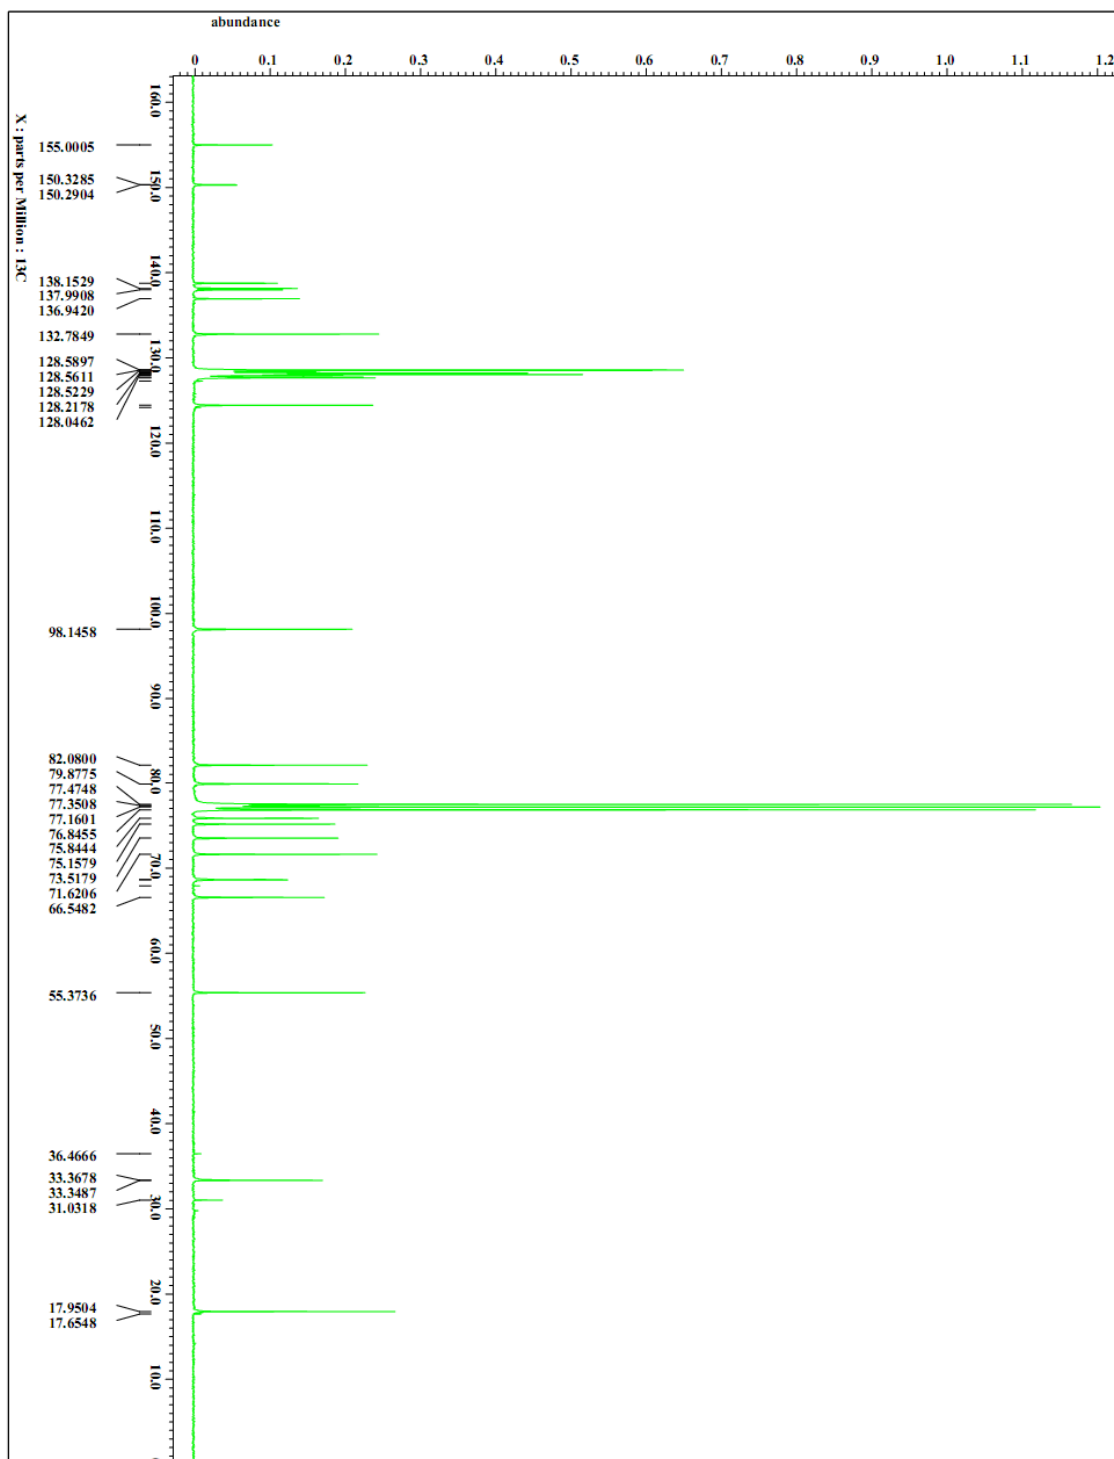

### $^1\text{H}$ NMR spectra of 4 in $\text{CDCl}_3$

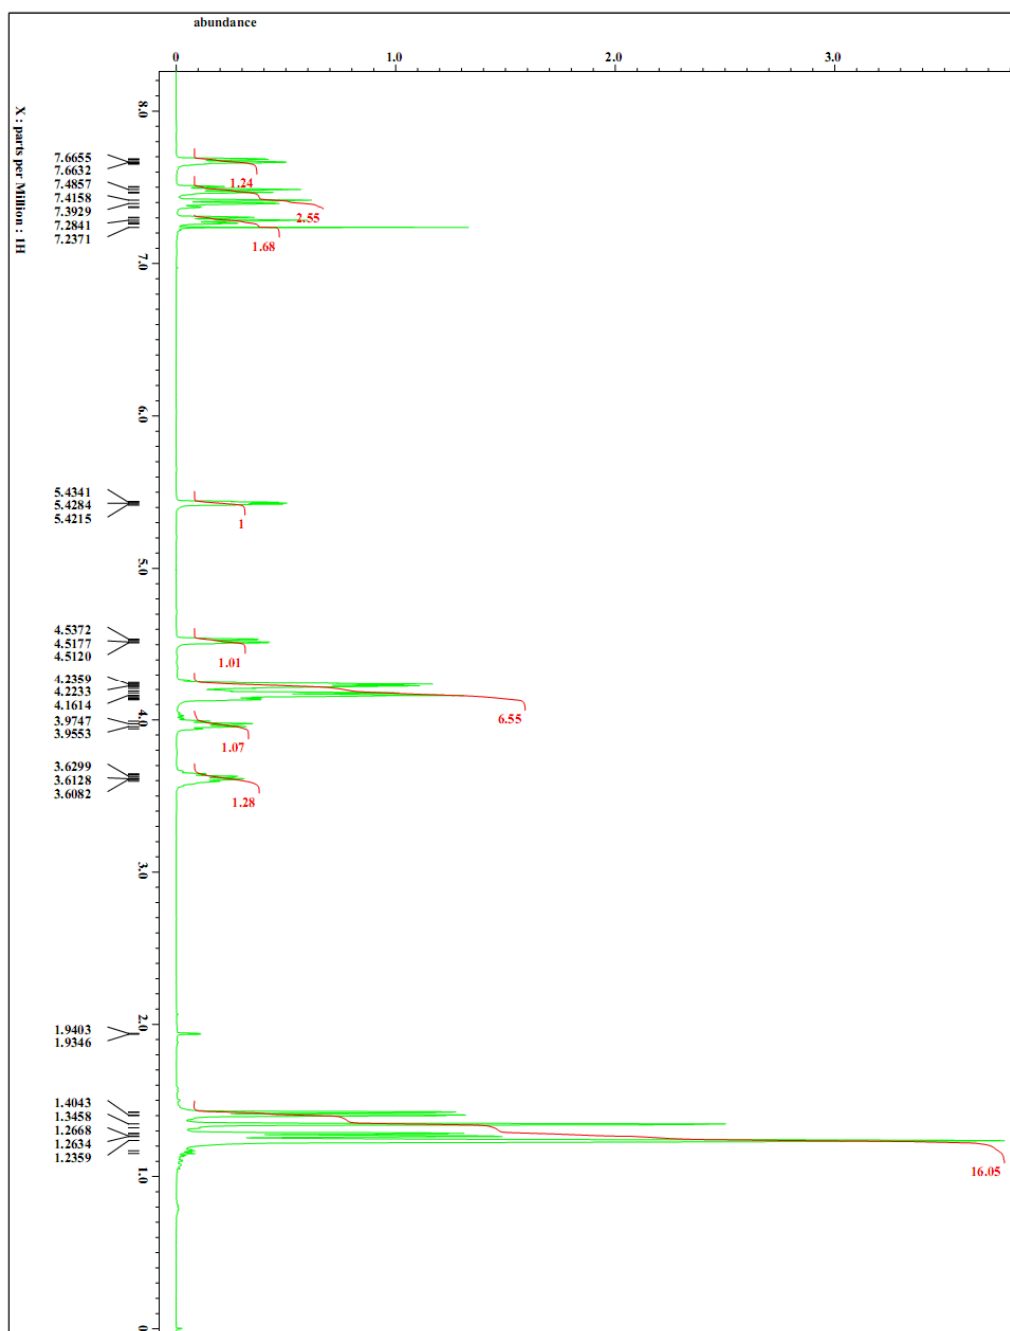

### $^{13}\text{C}$ NMR spectra of 4 in $\text{CDCl}_3$

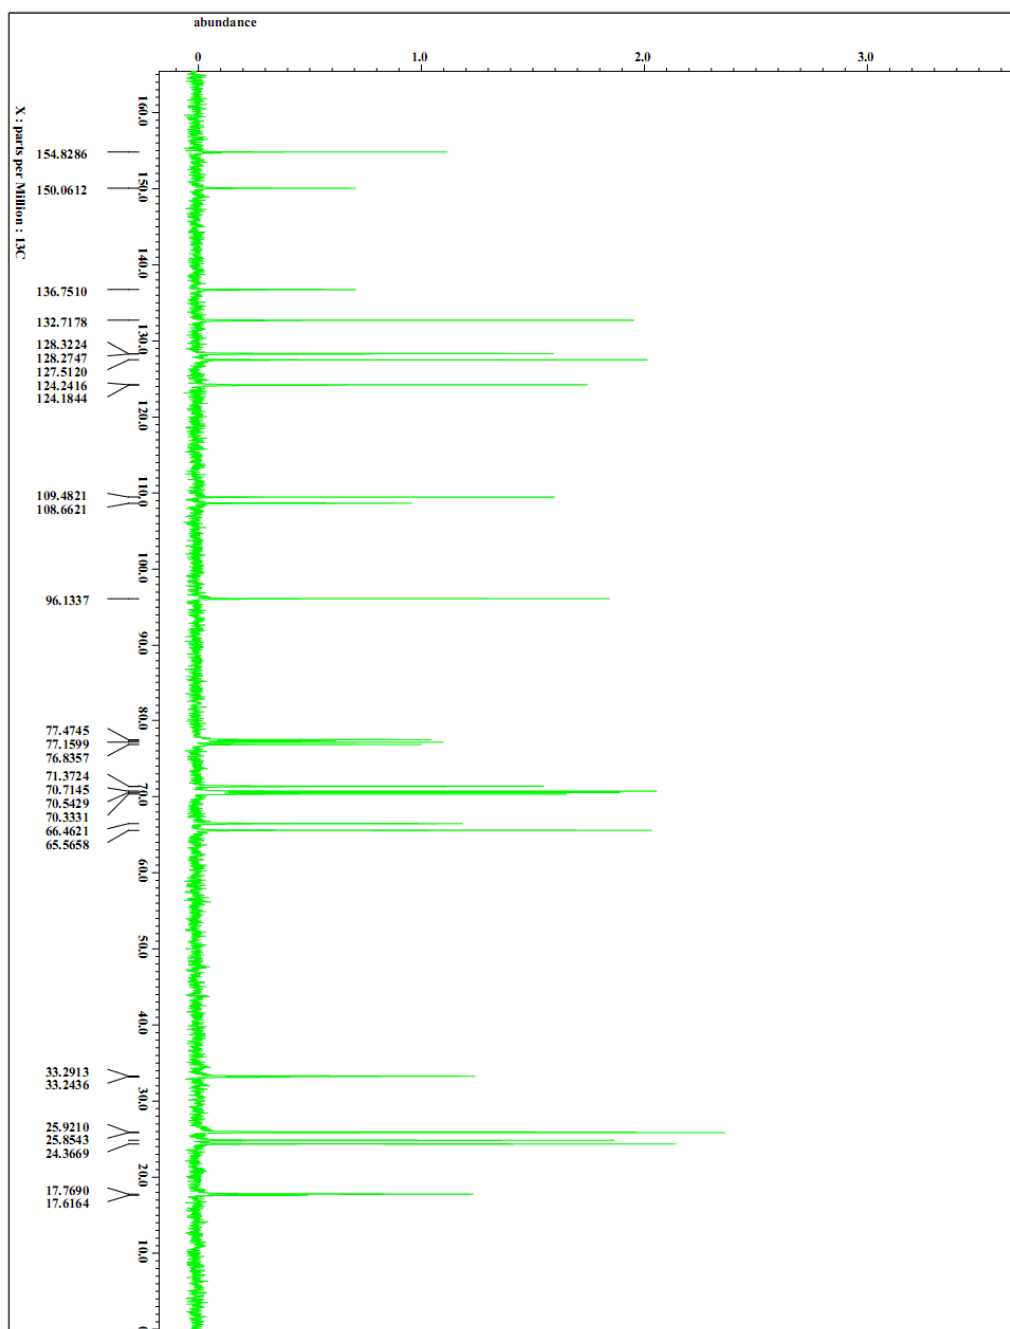

### $^1\text{H}$ NMR spectra of 6 in $\text{CDCl}_3$

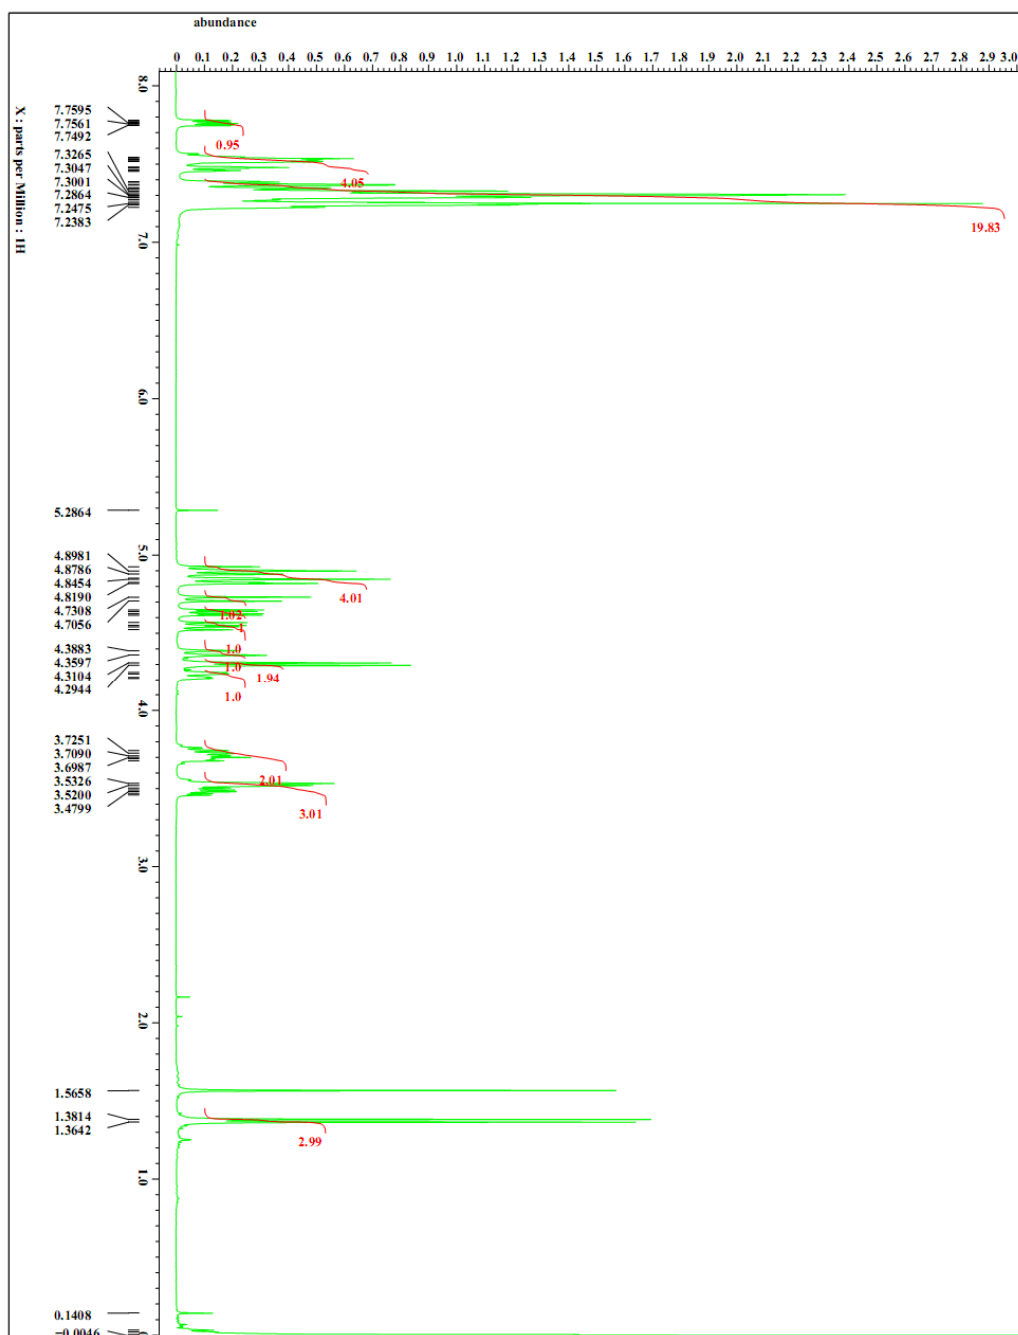

### $^{13}\text{C}$ NMR spectra of 6 in $\text{CDCl}_3$

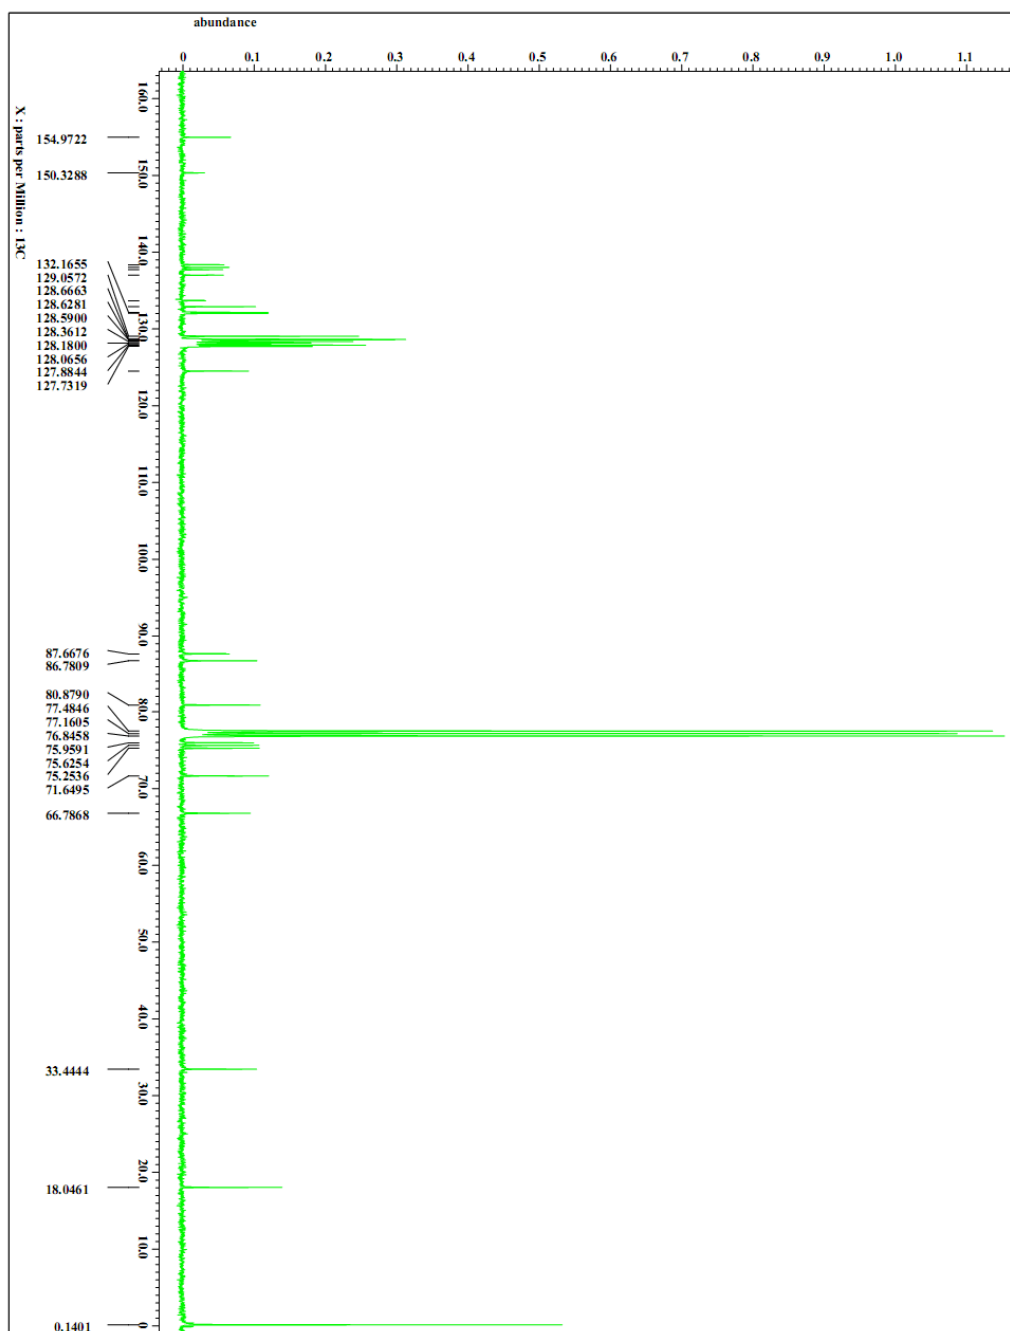



### $^1\text{H}$ NMR spectra of 8 in $\text{CDCl}_3$

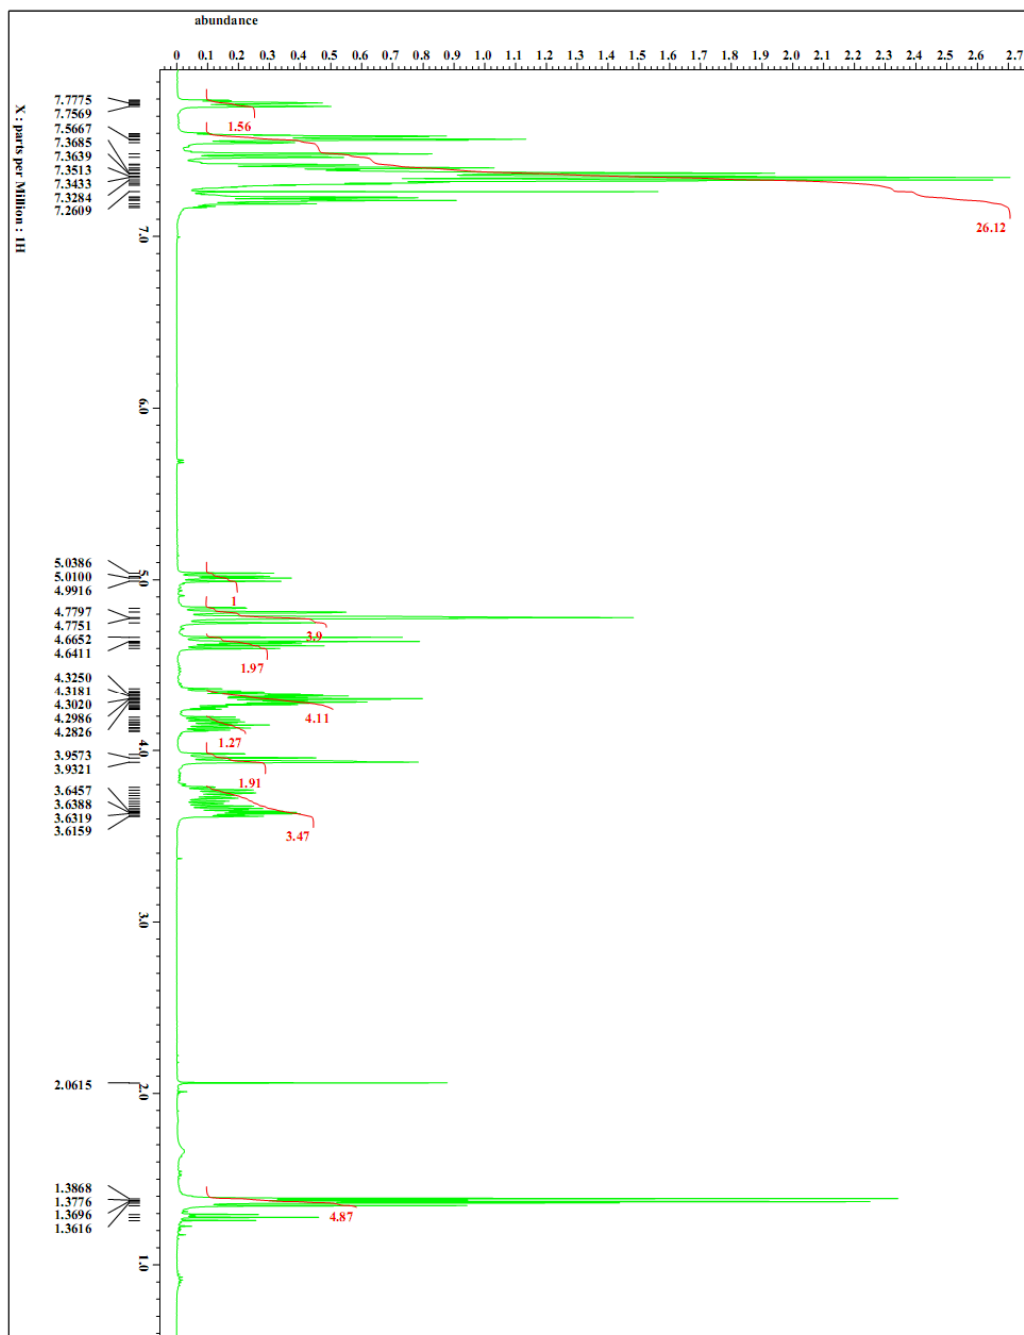

### $^{13}\text{C}$ NMR spectra of 8 in $\text{CDCl}_3$

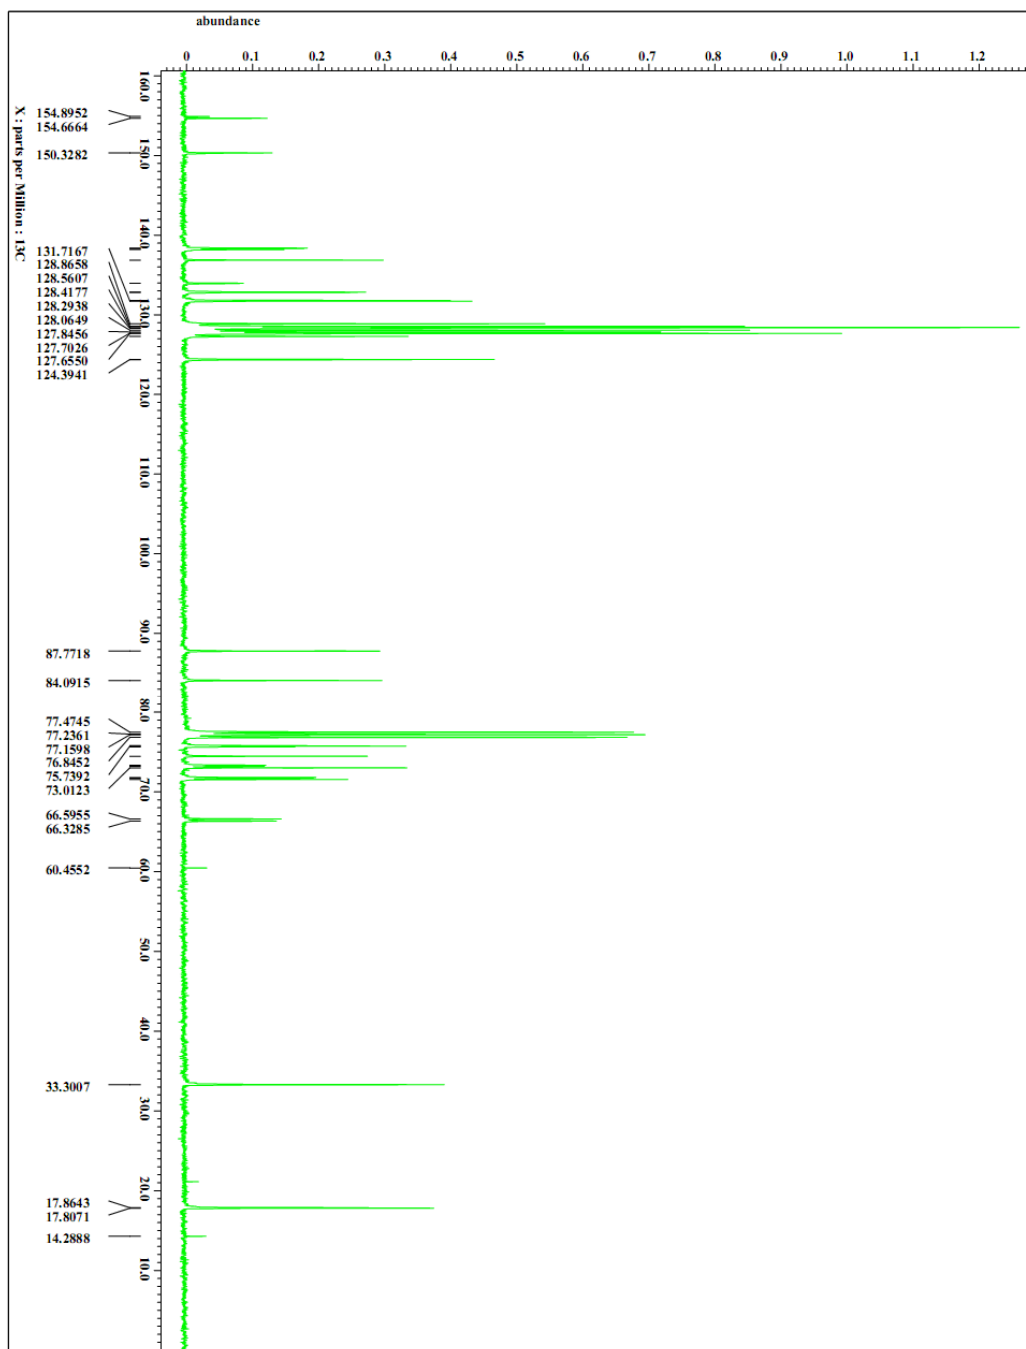

### $^1\text{H}$ NMR spectra of 10 in $\text{CDCl}_3$

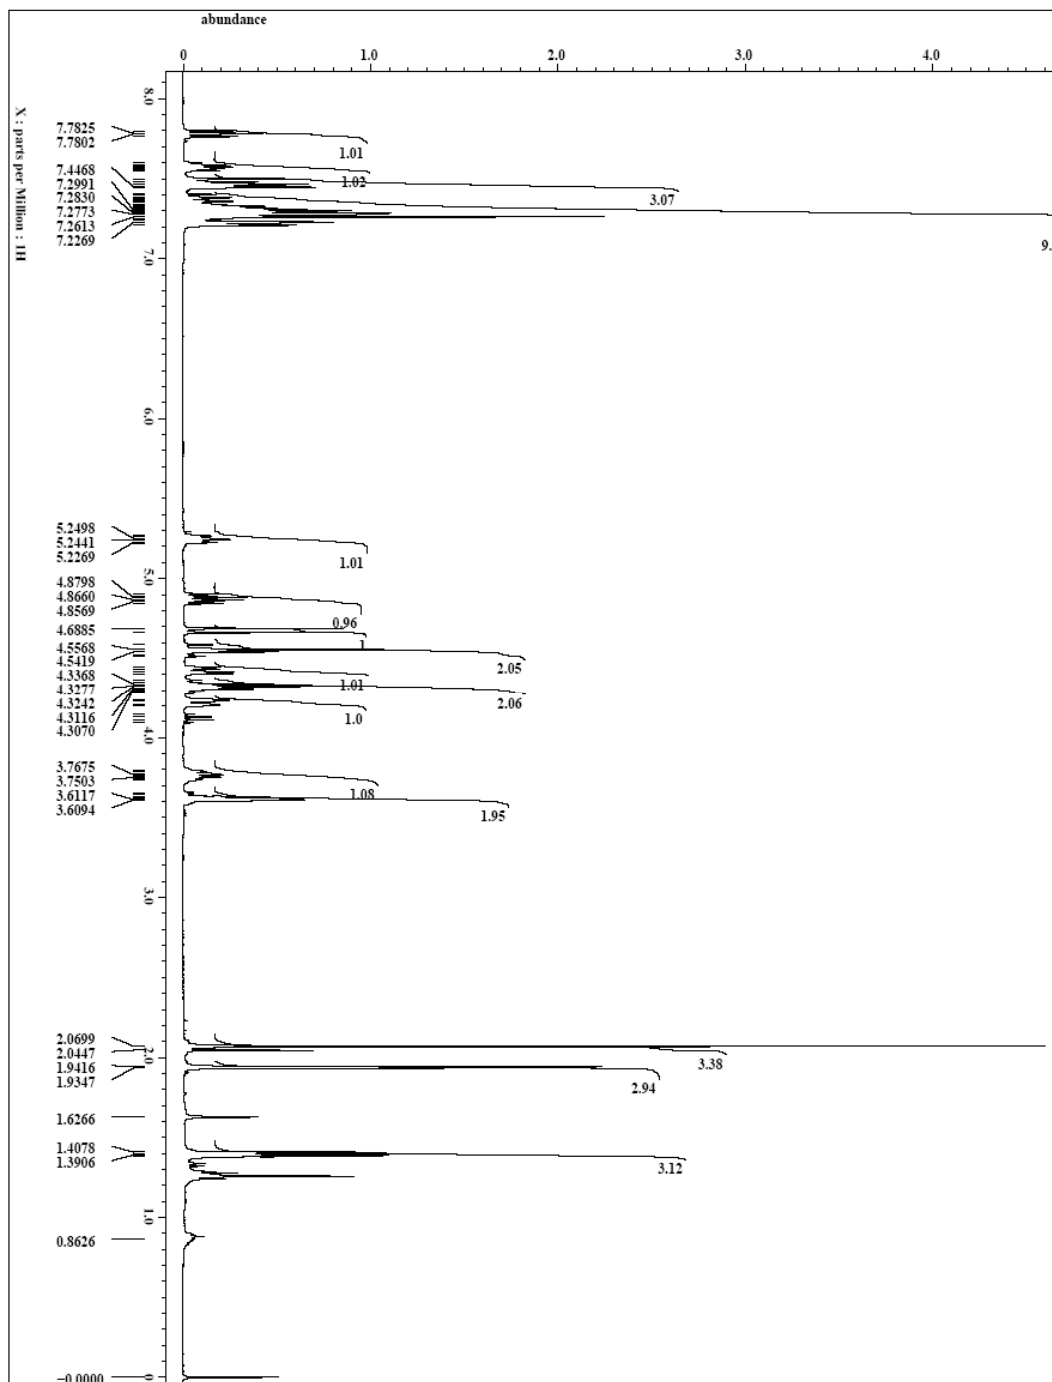

### $^{13}\text{C}$ NMR spectra of 10 in $\text{CDCl}_3$

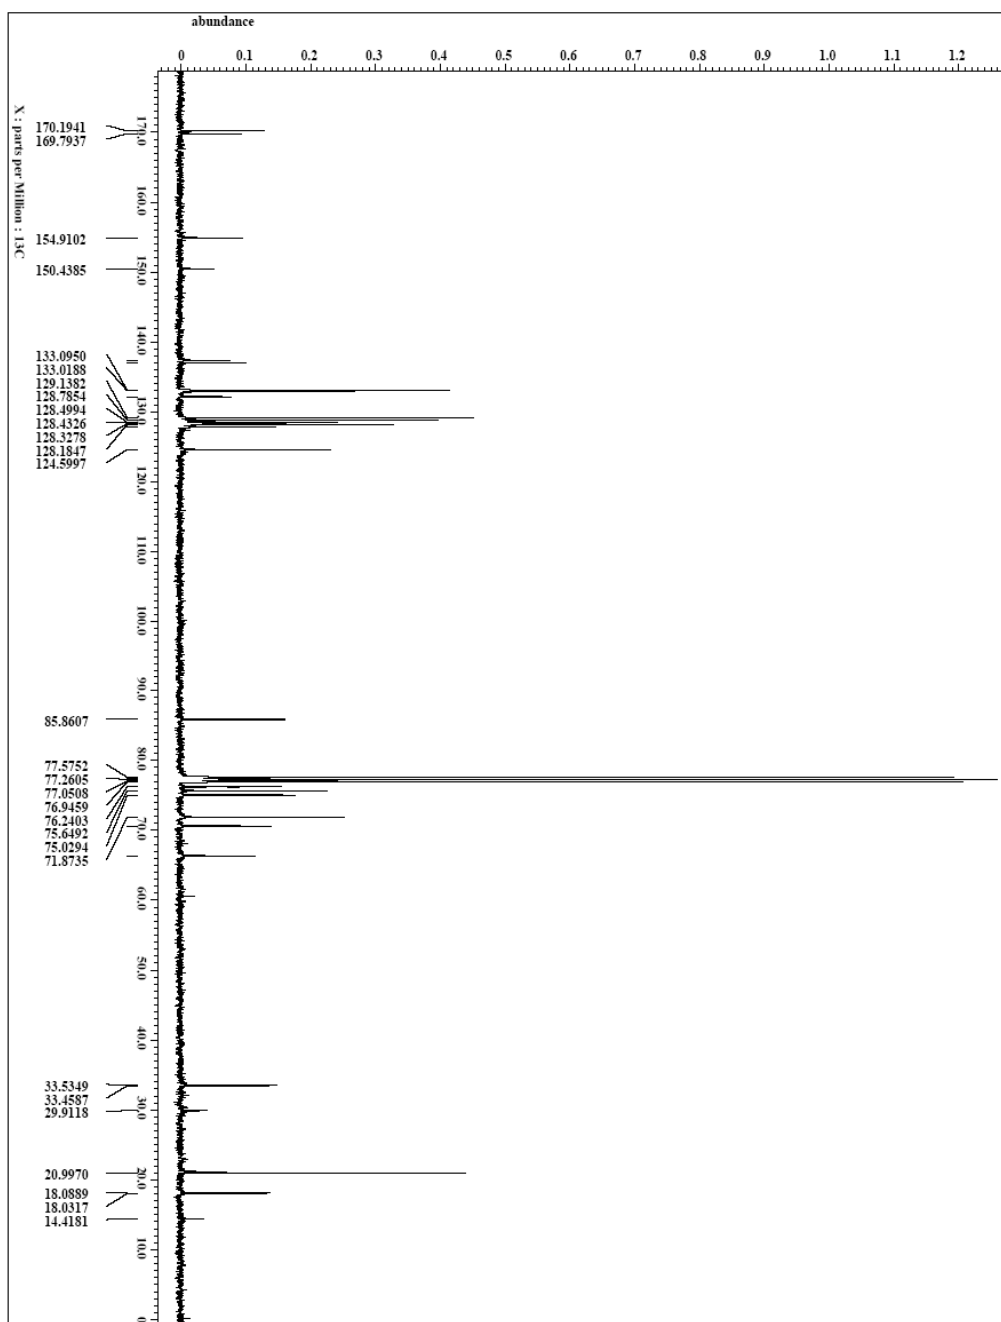

### $^1\text{H}$ NMR spectra of 11 in $\text{CDCl}_3$

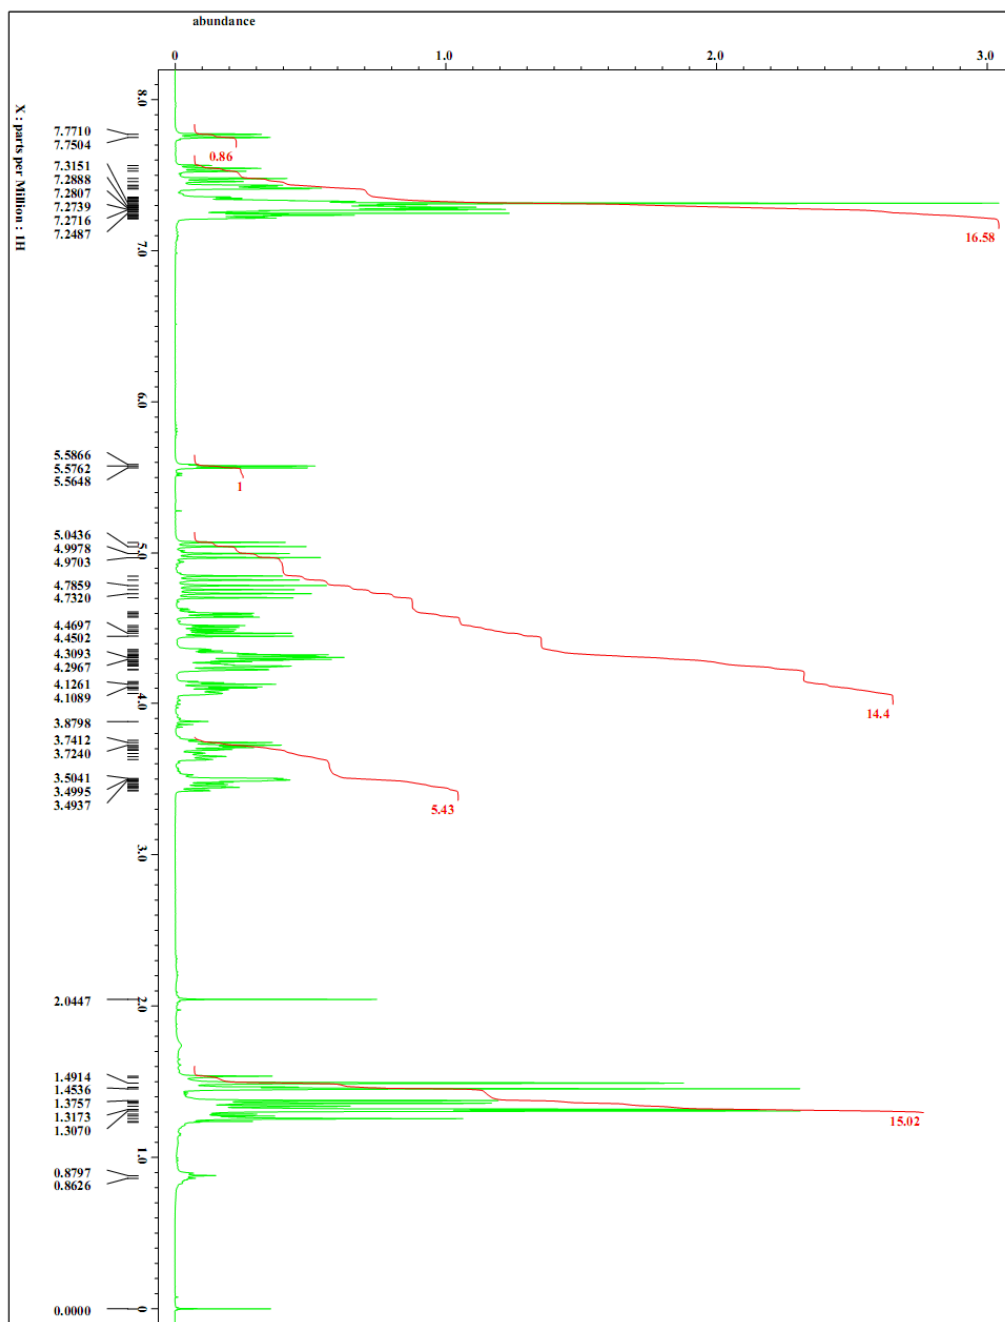

### $^{13}\text{C}$ NMR spectra of 11 in $\text{CDCl}_3$

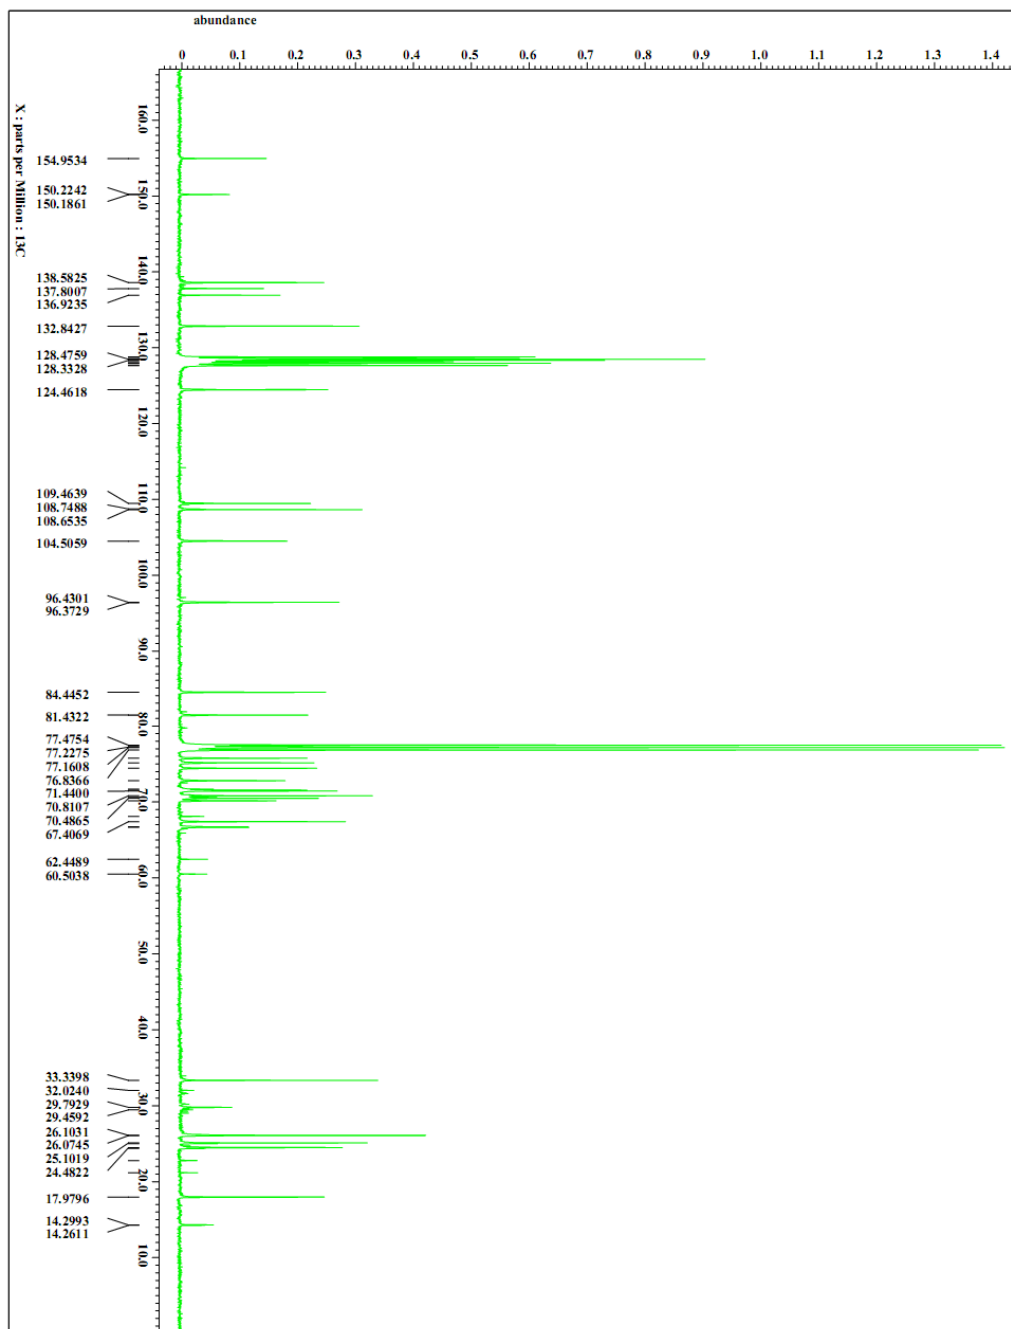

### $^1\text{H}$ NMR spectra of $12\beta$ in $\text{CDCl}_3$

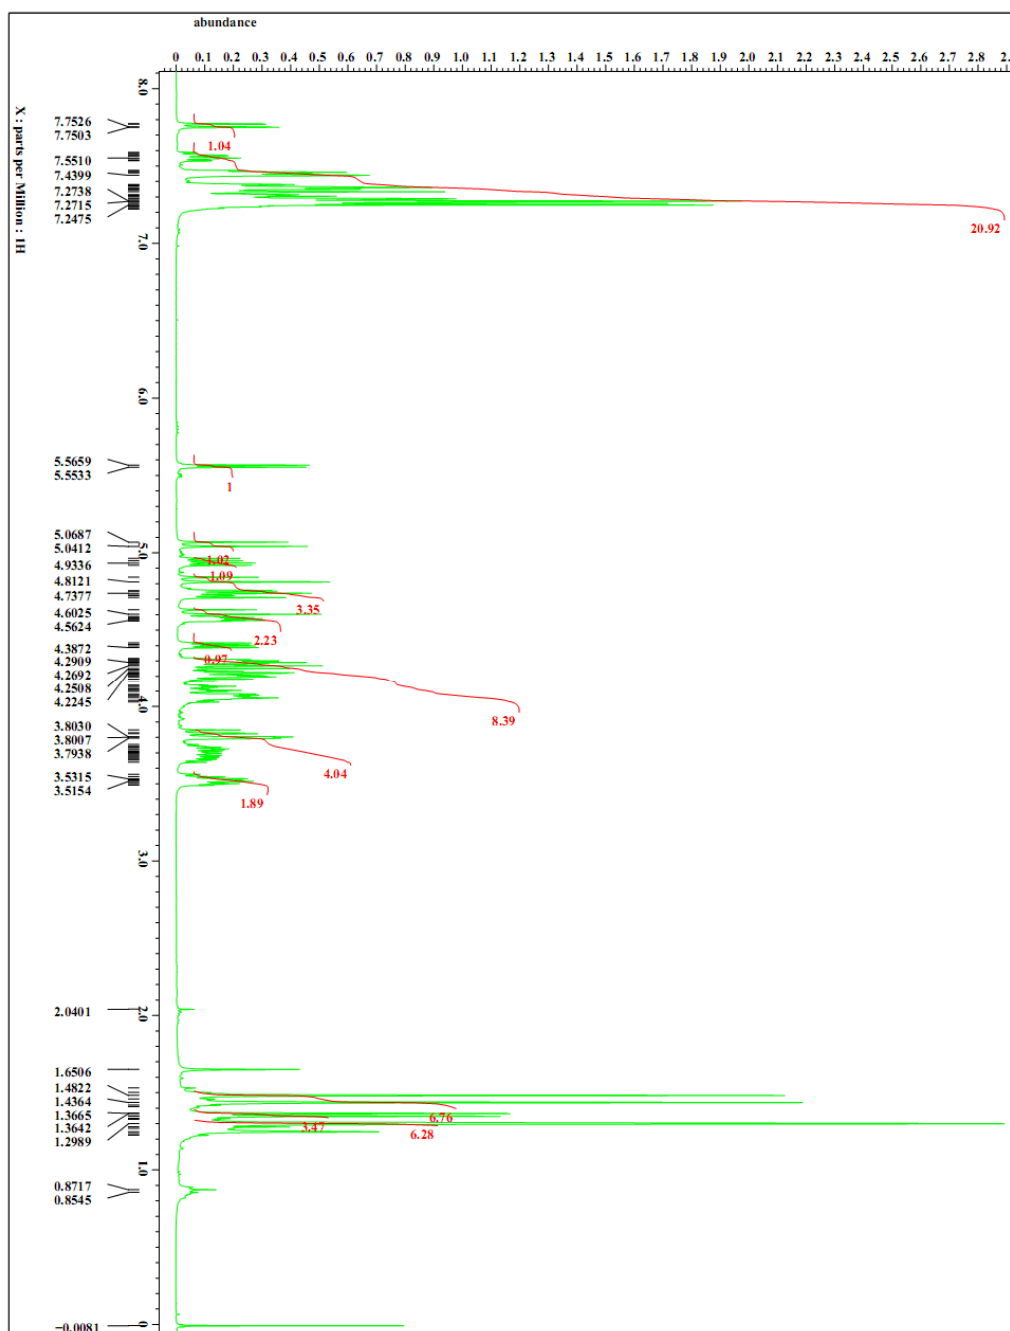

### $^{13}\text{C}$ NMR spectra of $12\beta$ in $\text{CDCl}_3$

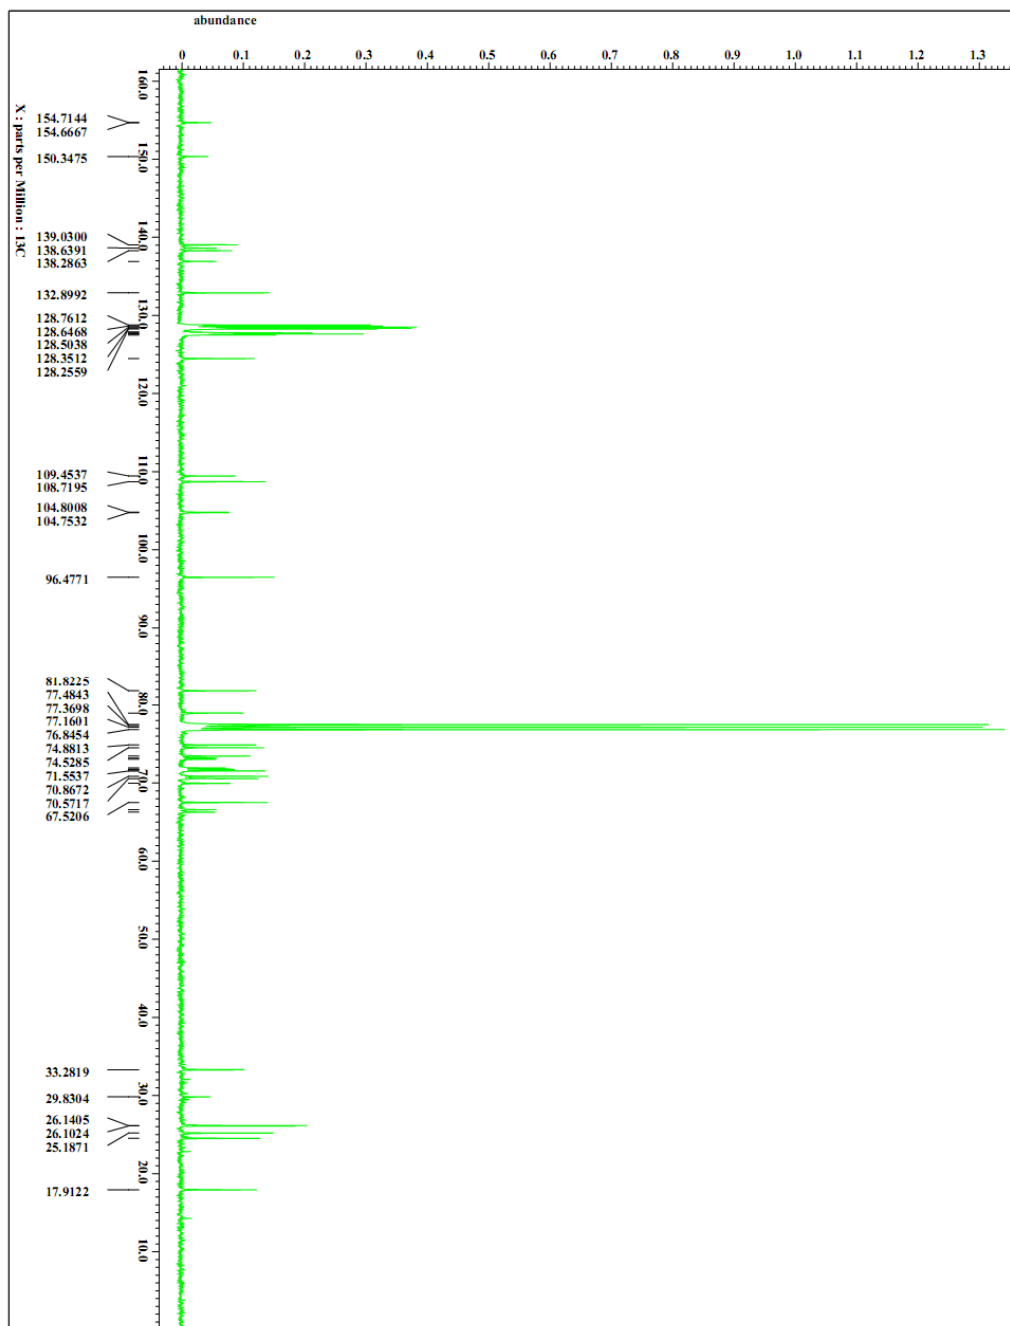



### $^1\text{H}$ NMR spectra of 12 $\alpha$ in $\text{CDCl}_3$

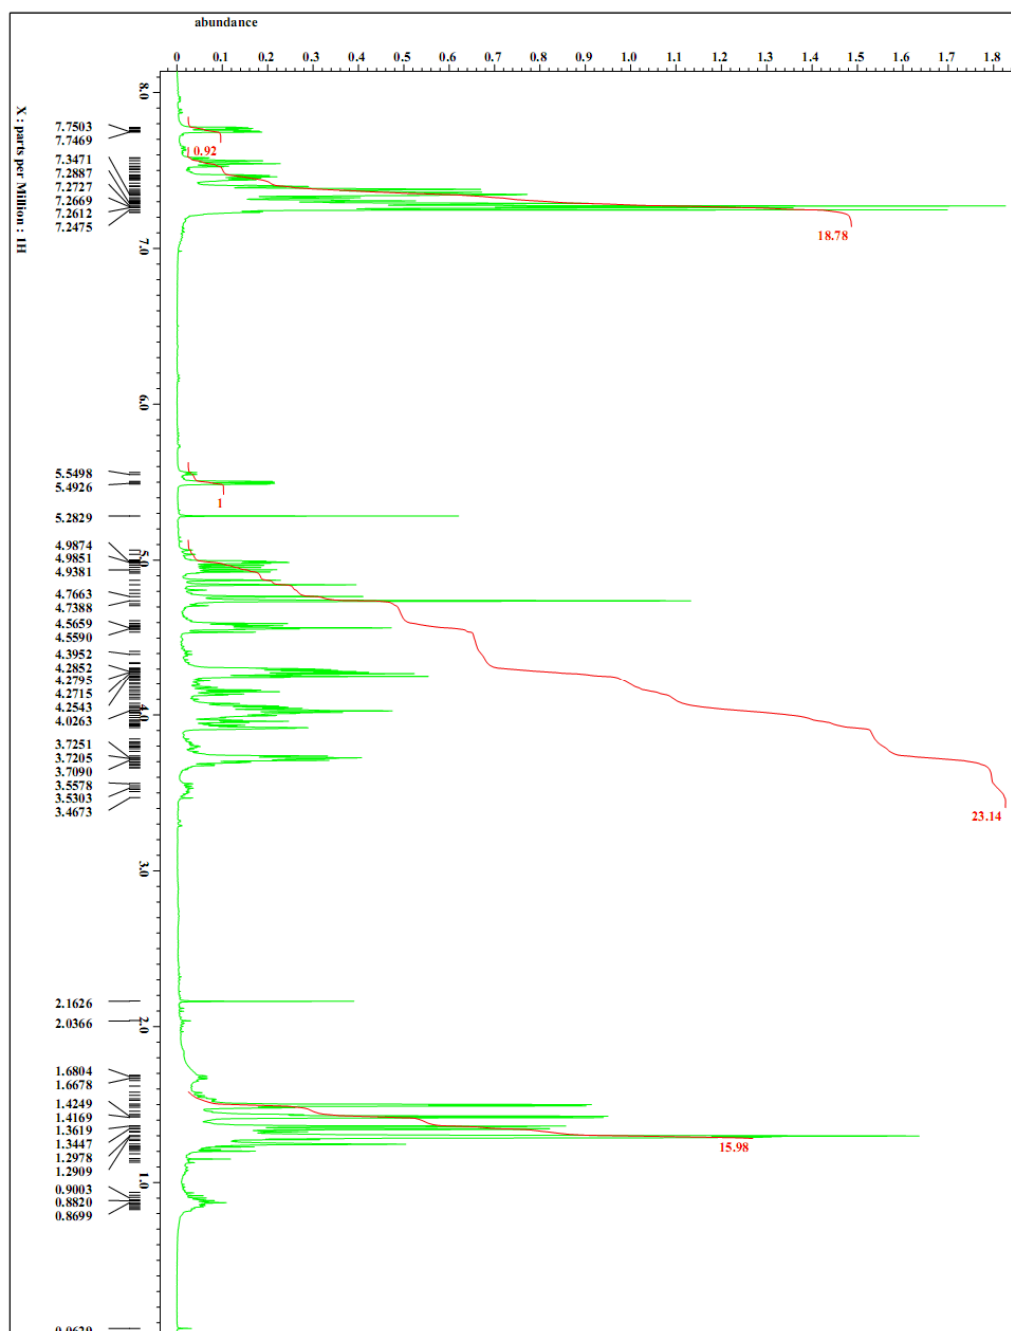

### $^{13}\text{C}$ NMR spectra of 12 $\alpha$ in $\text{CDCl}_3$

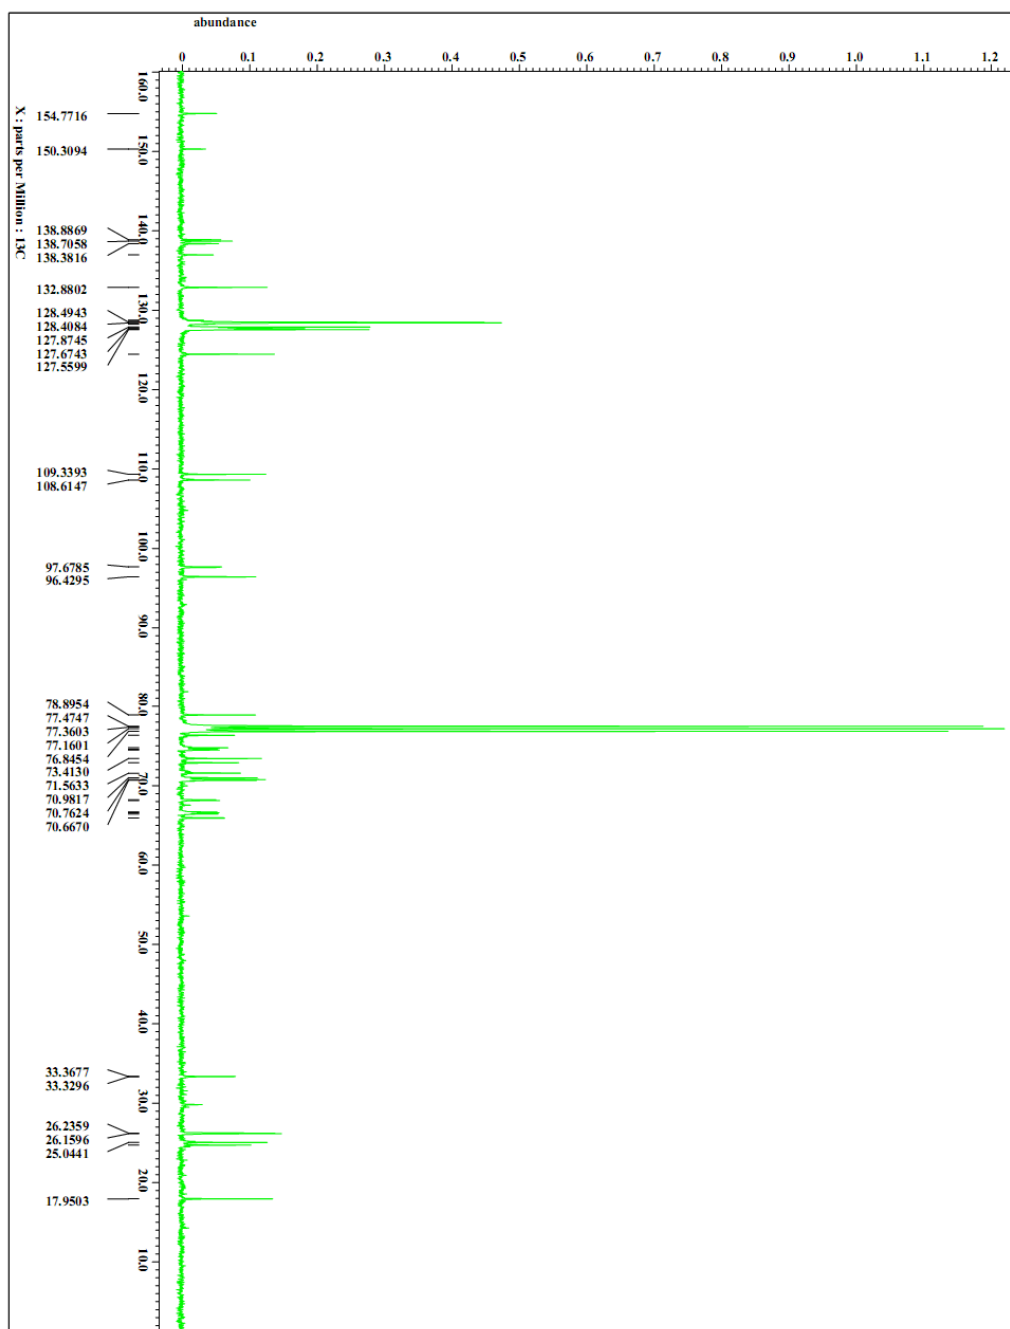

### $^1\text{H}$ NMR spectra of 13 in $\text{CDCl}_3$

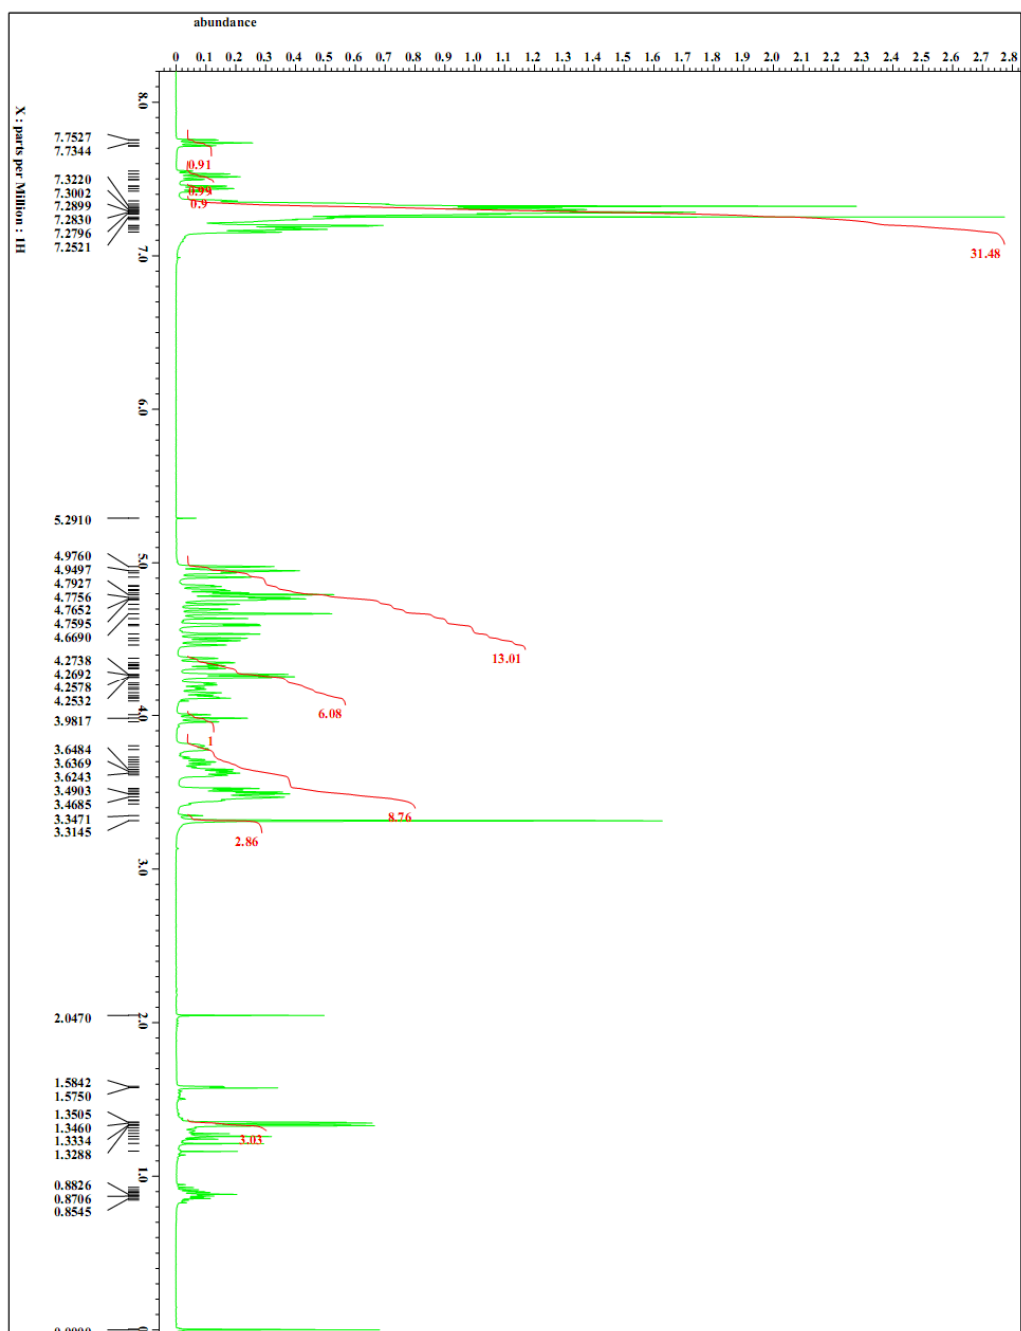

### $^{13}\text{C}$ NMR spectra of 13 in $\text{CDCl}_3$

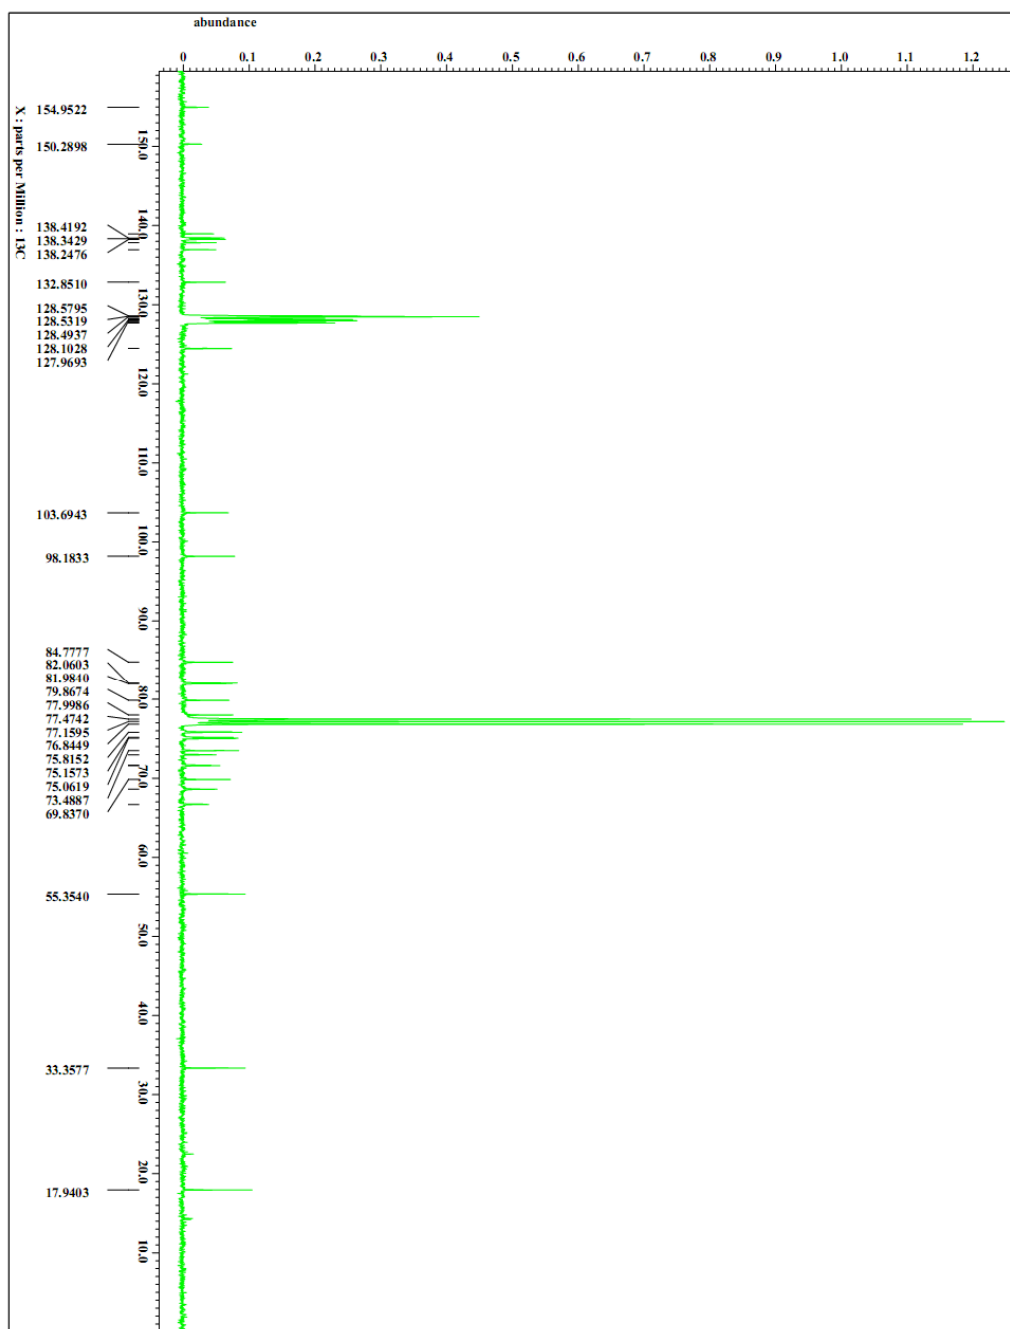

### $^1\text{H}$ NMR spectra of 14 in $\text{CDCl}_3$

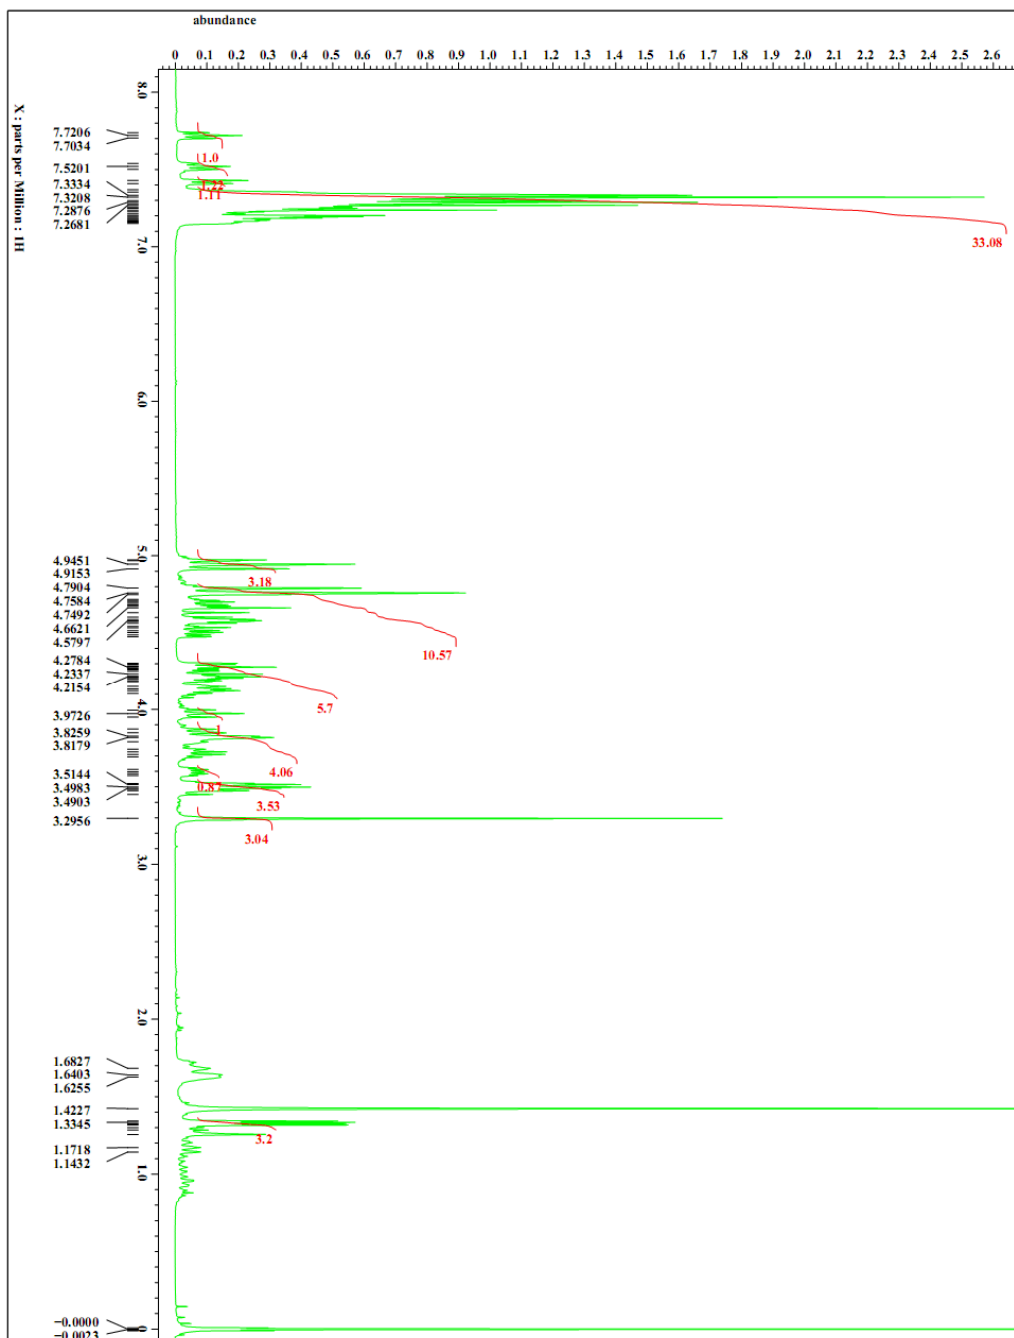

### $^{13}\text{C}$ NMR spectra of 14 in $\text{CDCl}_3$

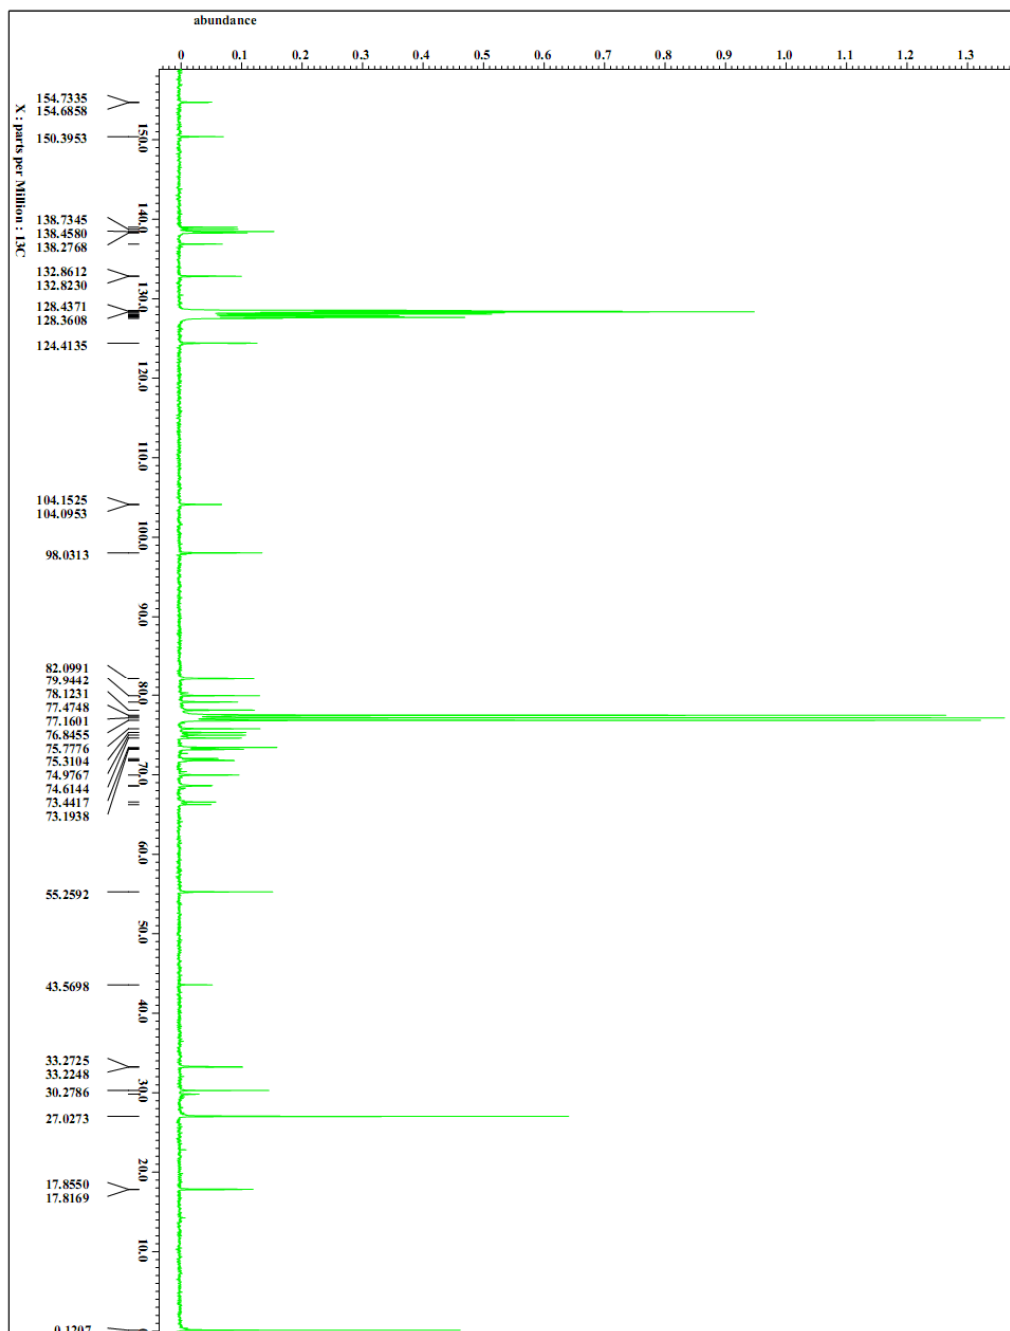

### $^1\text{H}$ NMR spectra of 15 in $\text{CDCl}_3$

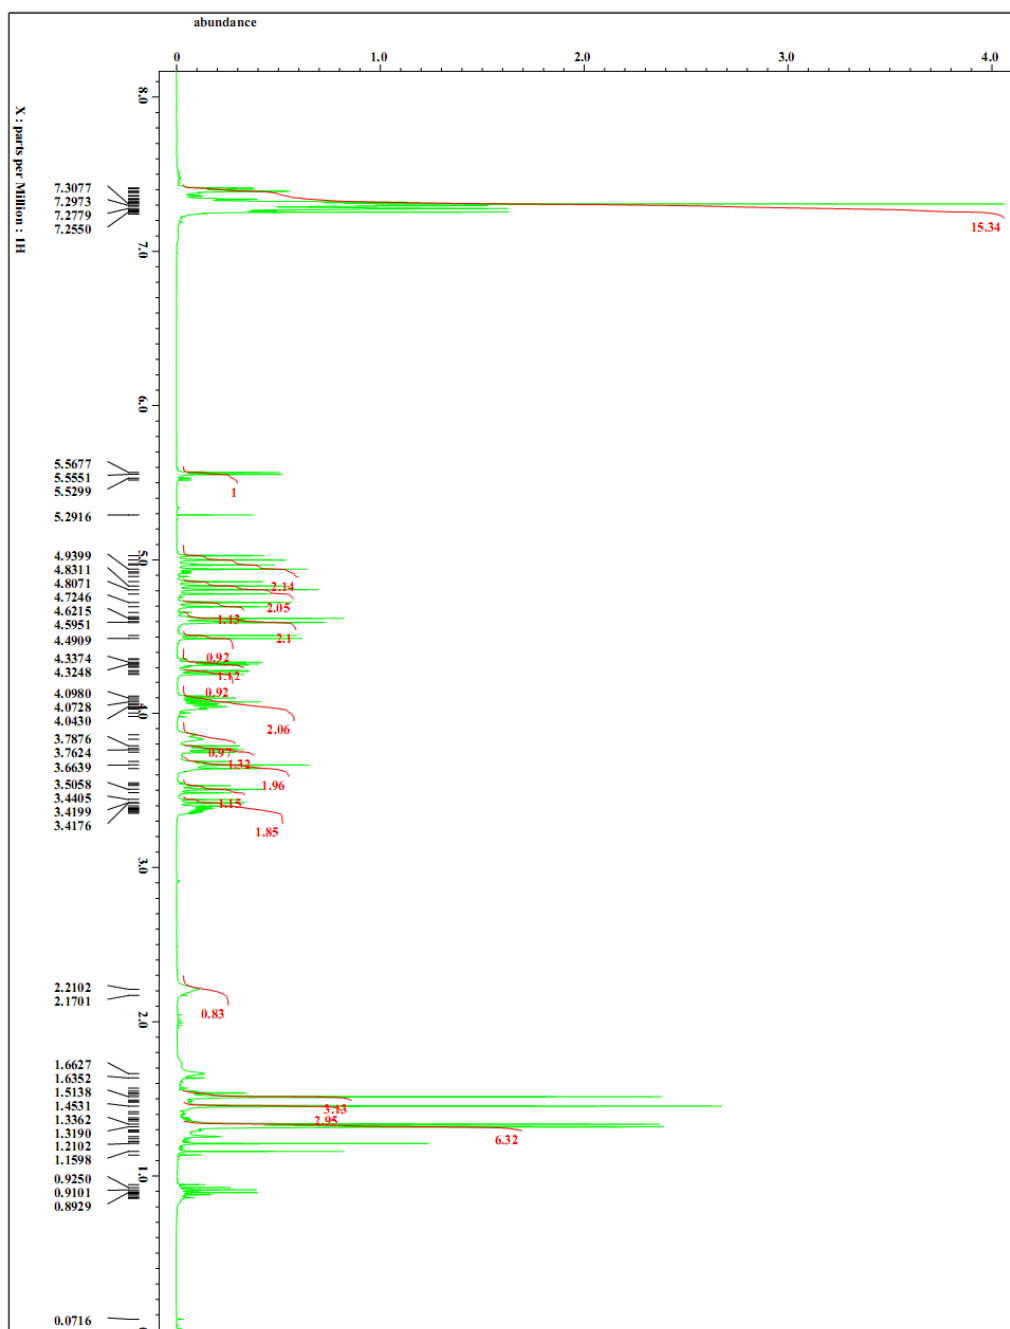

### $^{13}\text{C}$ NMR spectra of 15 in $\text{CDCl}_3$

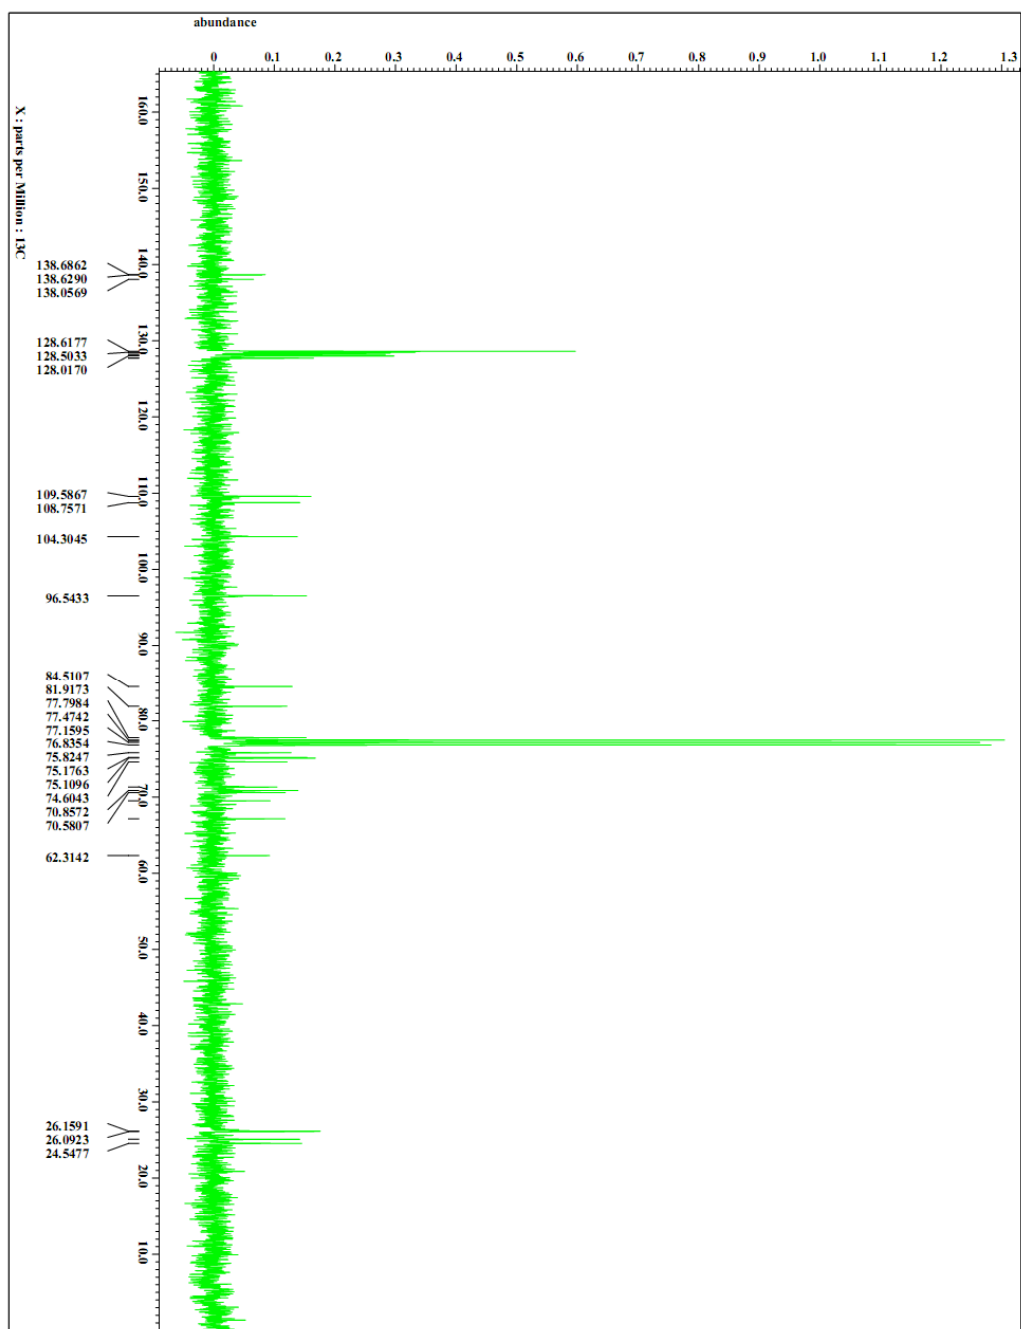



### $^1\text{H}$ NMR spectra of 16 in $\text{CDCl}_3$

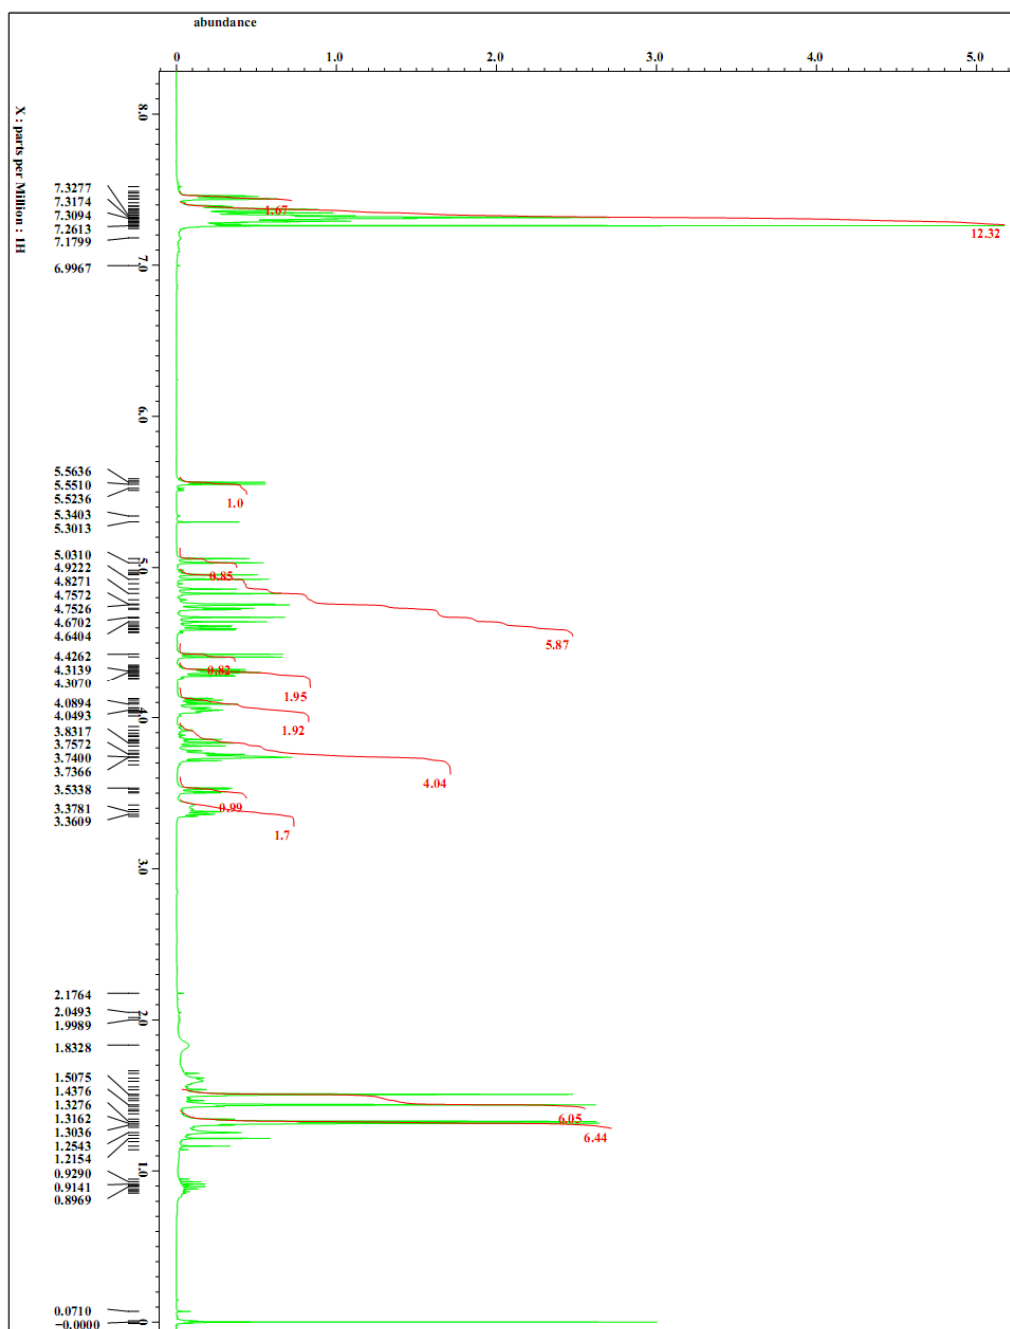

### $^{13}\text{C}$ NMR spectra of 16 in $\text{CDCl}_3$

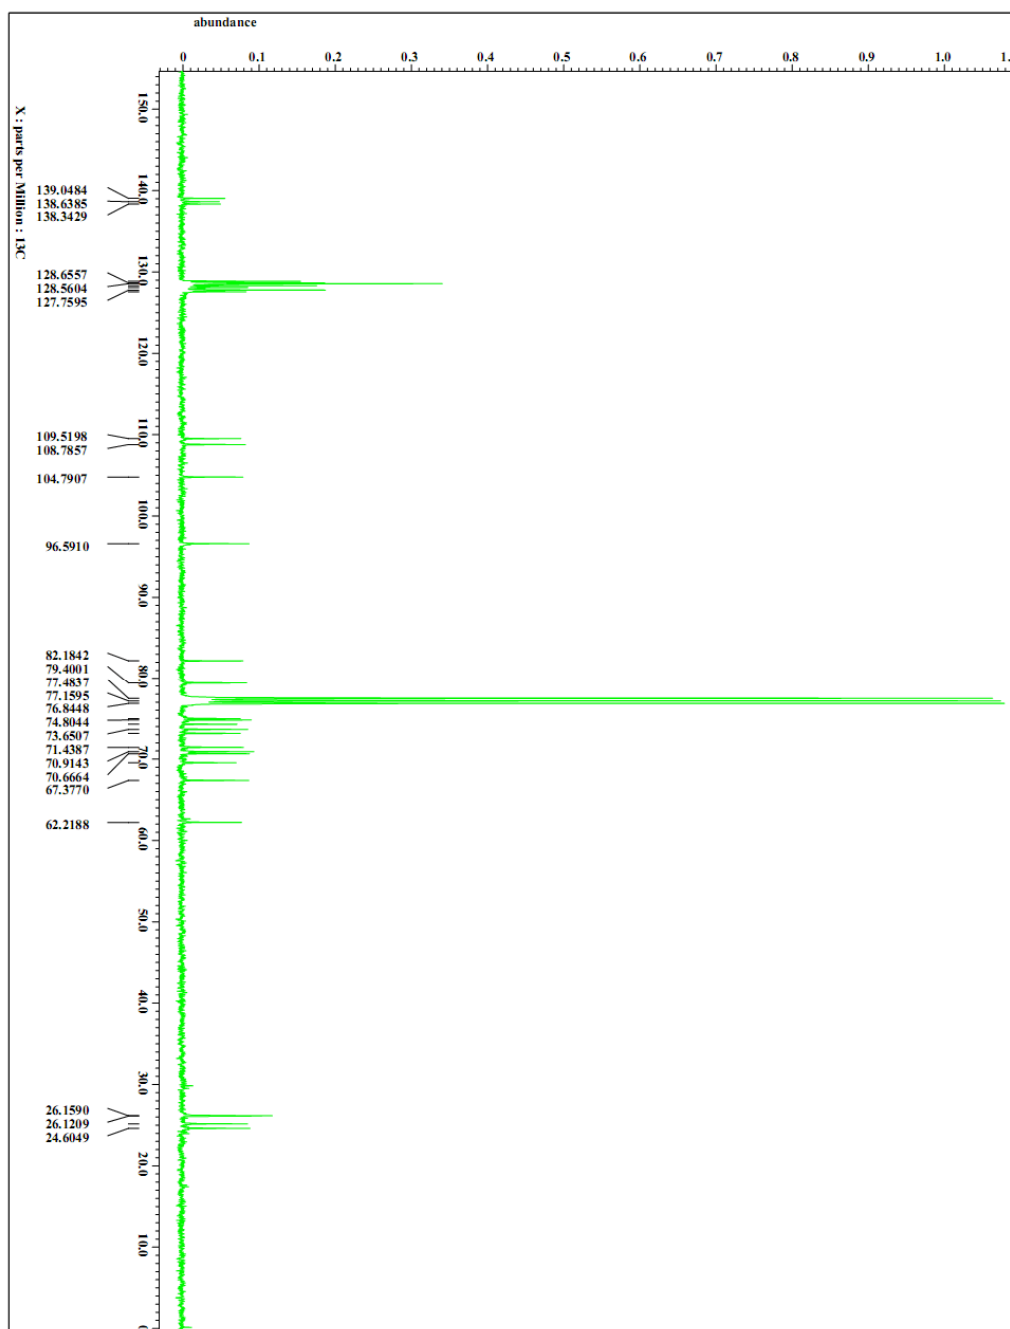

### $^1\text{H}$ NMR spectra of 17 in $\text{CDCl}_3$

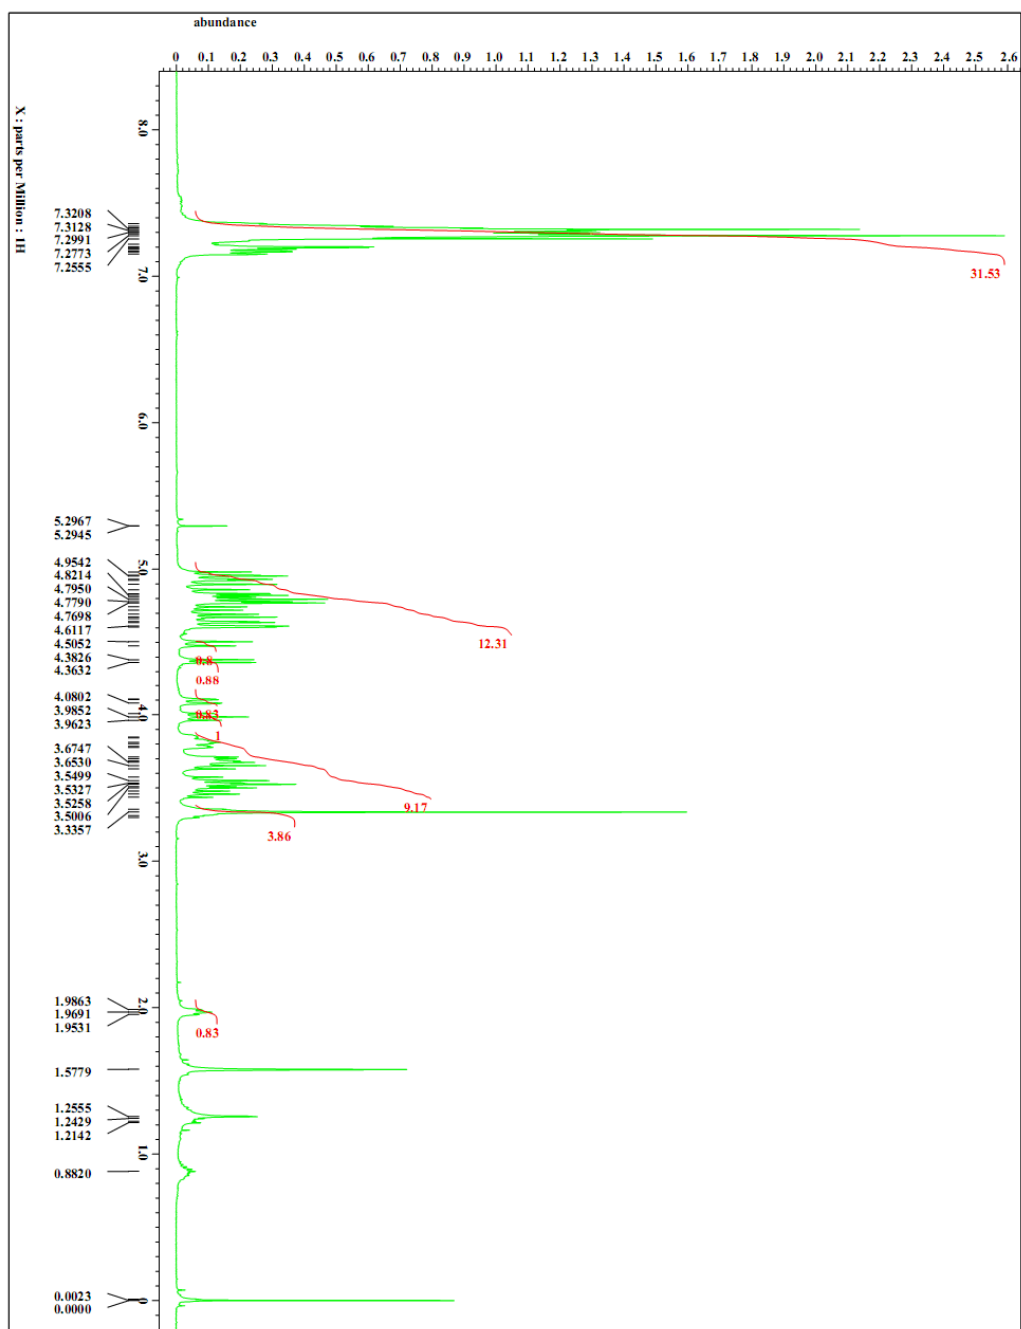

### $^{13}\text{C}$ NMR spectra of 17 in $\text{CDCl}_3$

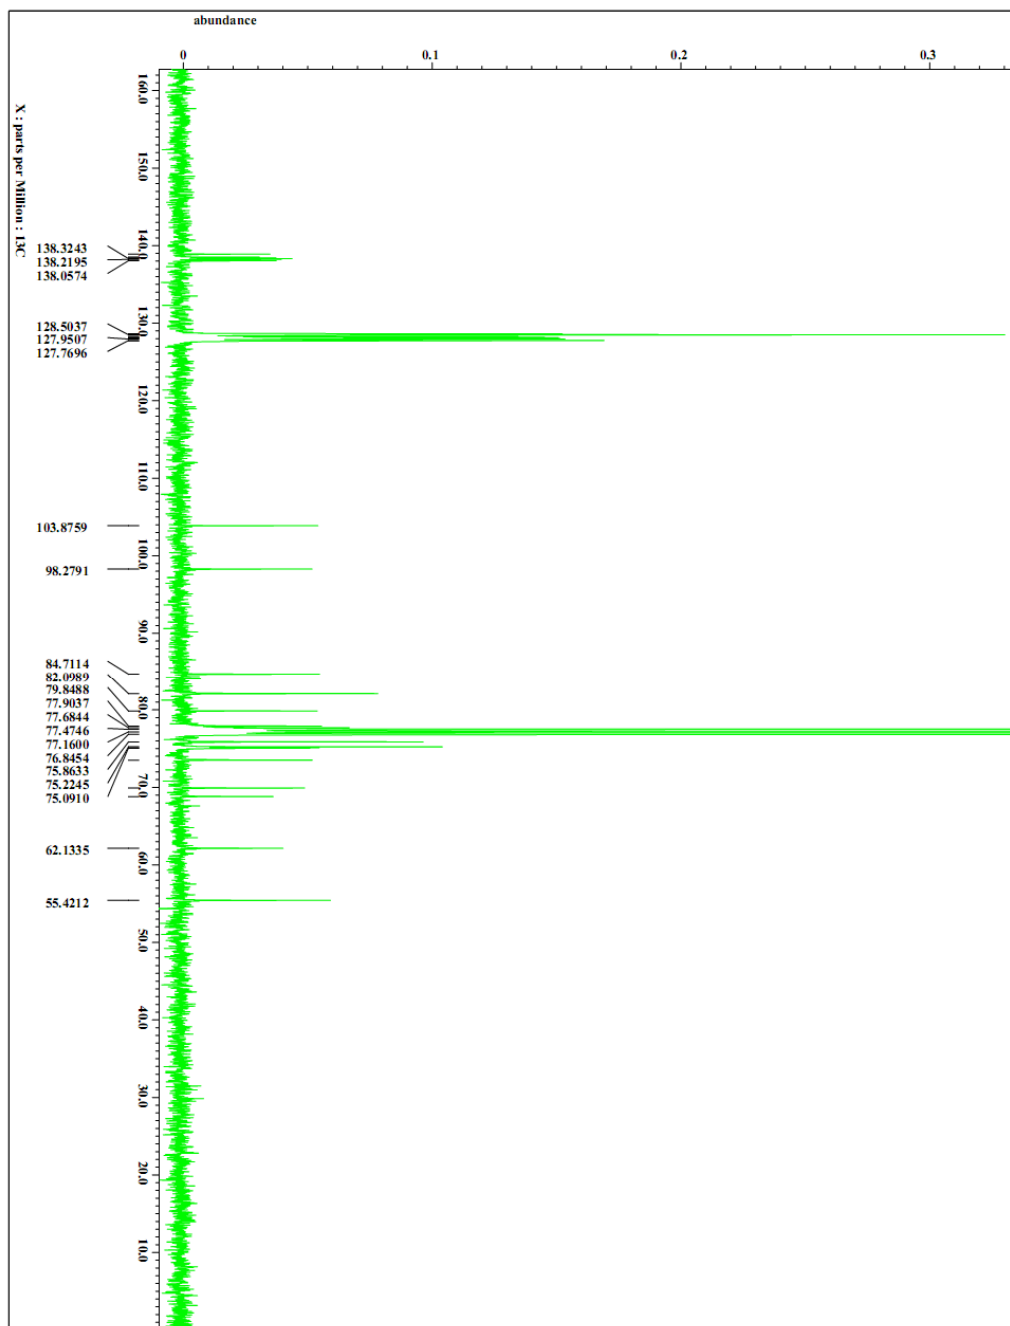

### $^1\text{H}$ NMR spectra of 18 in $\text{CDCl}_3$

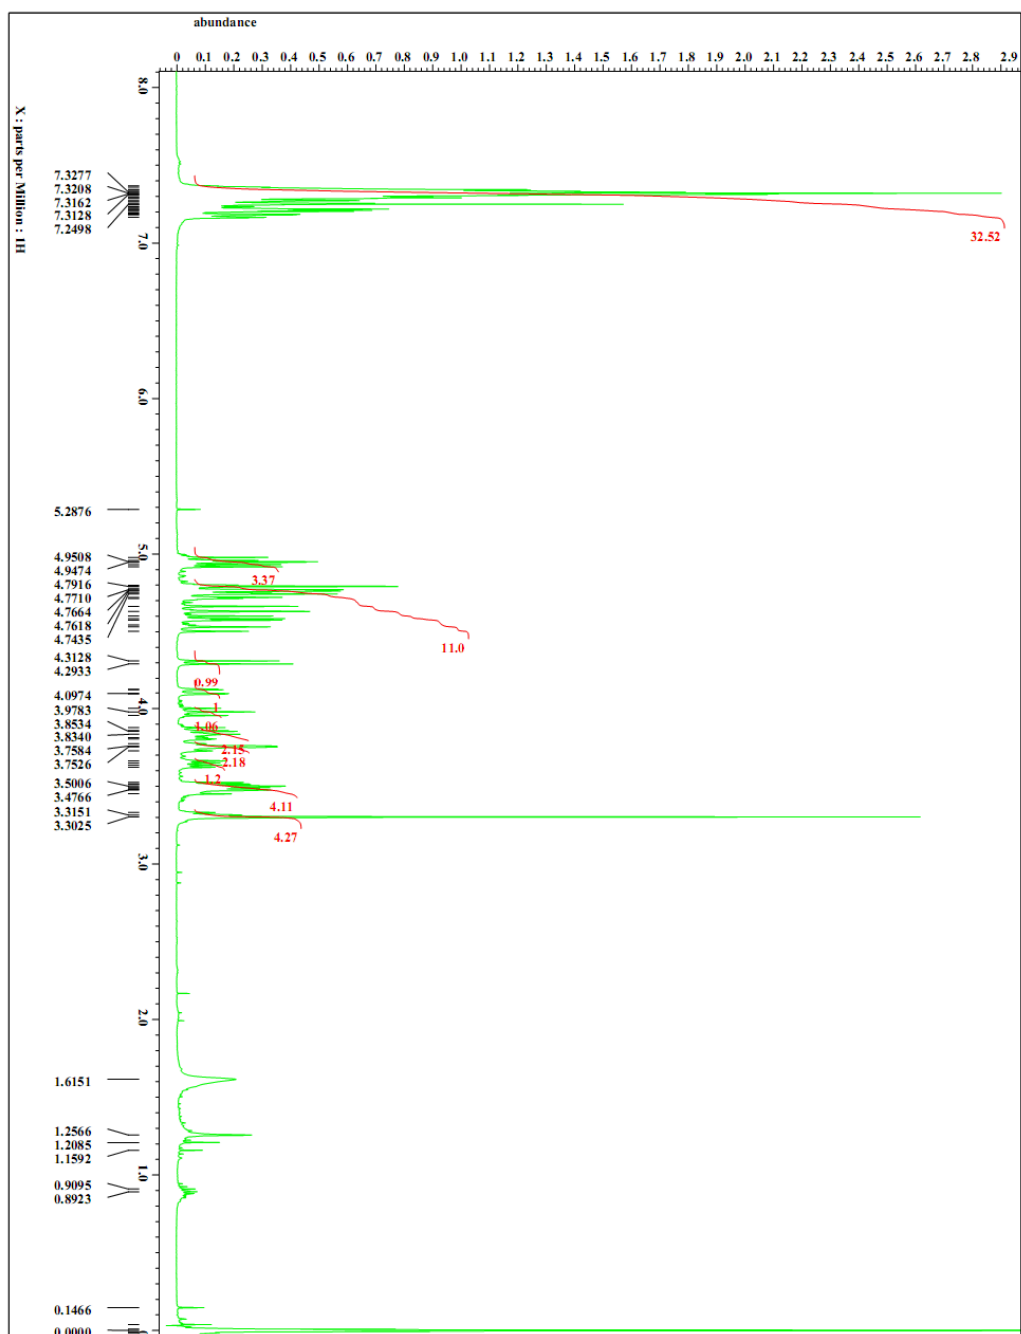

### $^{13}\text{C}$ NMR spectra of 18 in $\text{CDCl}_3$

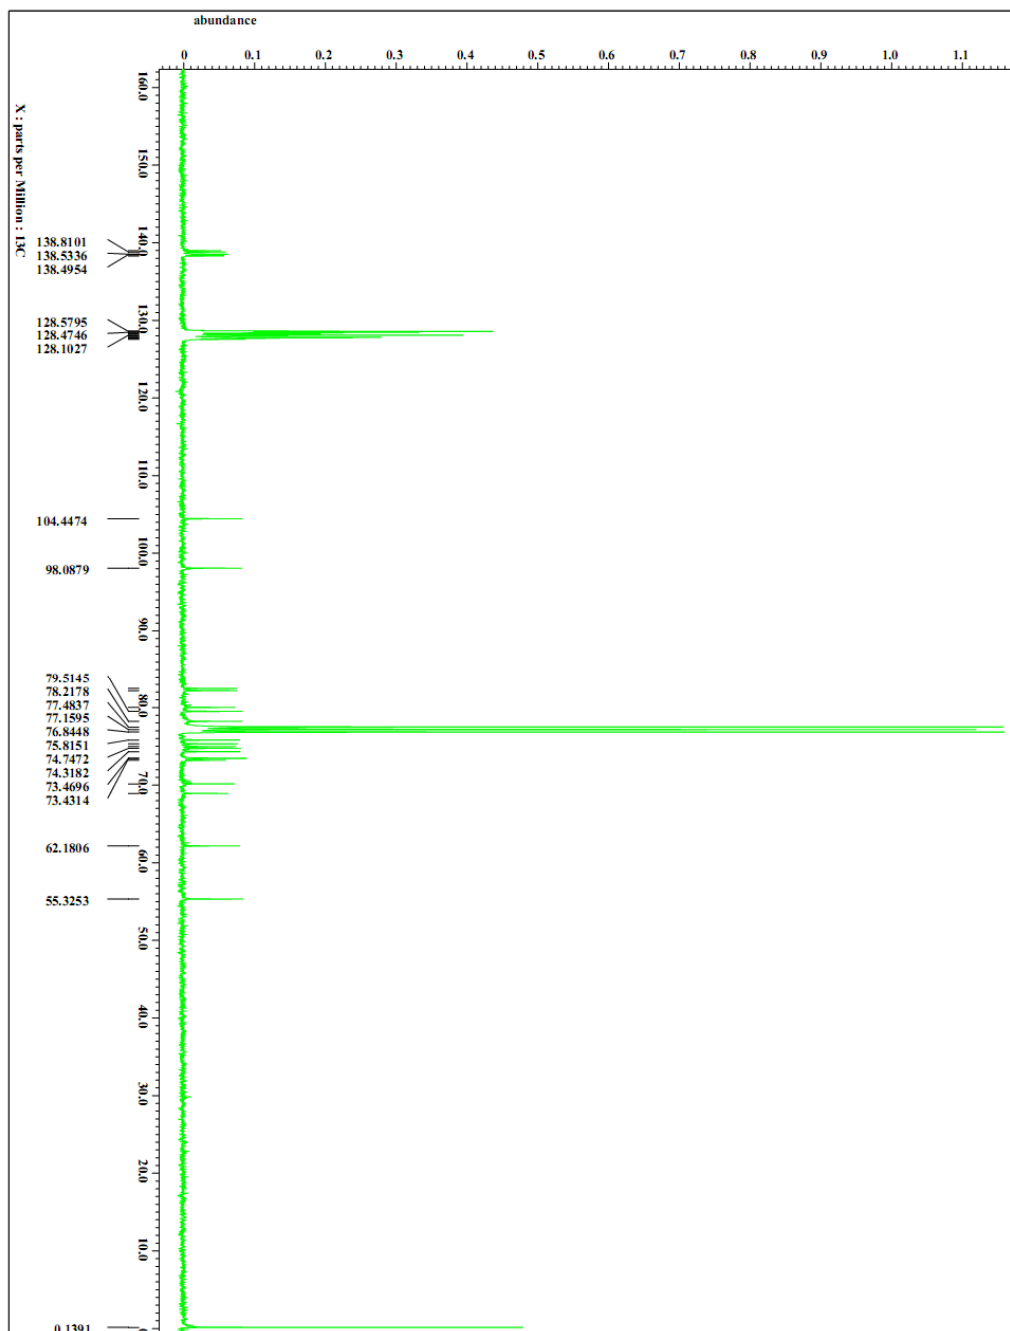

### $^1\text{H}$ NMR spectra of 19 in $\text{CDCl}_3$

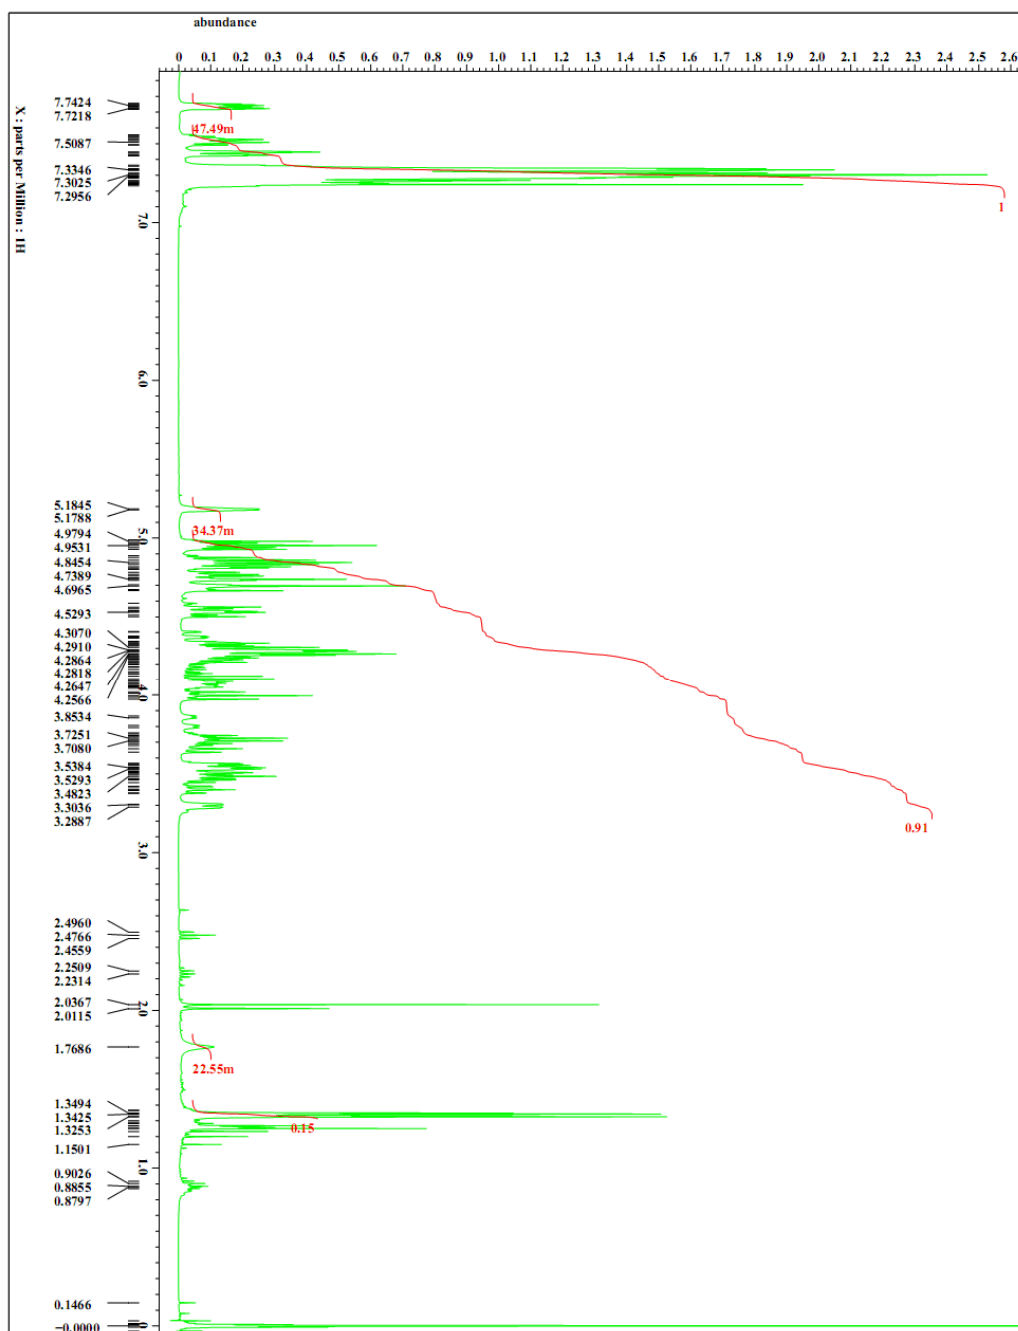

### $^{13}\text{C}$ NMR spectra of 19 in $\text{CDCl}_3$

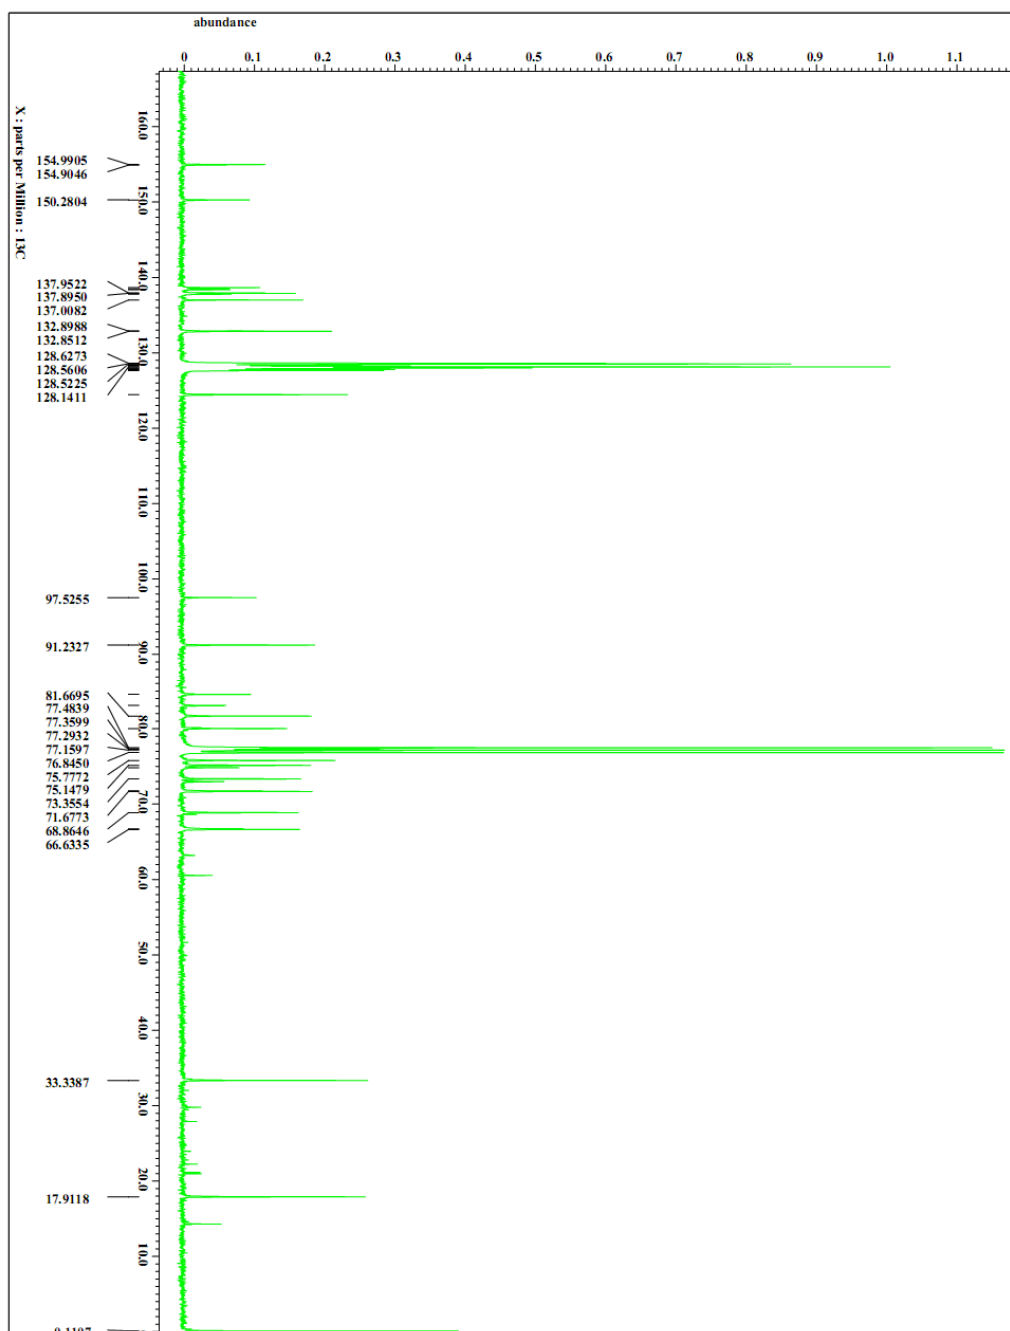



### $^1\text{H}$ NMR spectra of 20 in $\text{CDCl}_3$

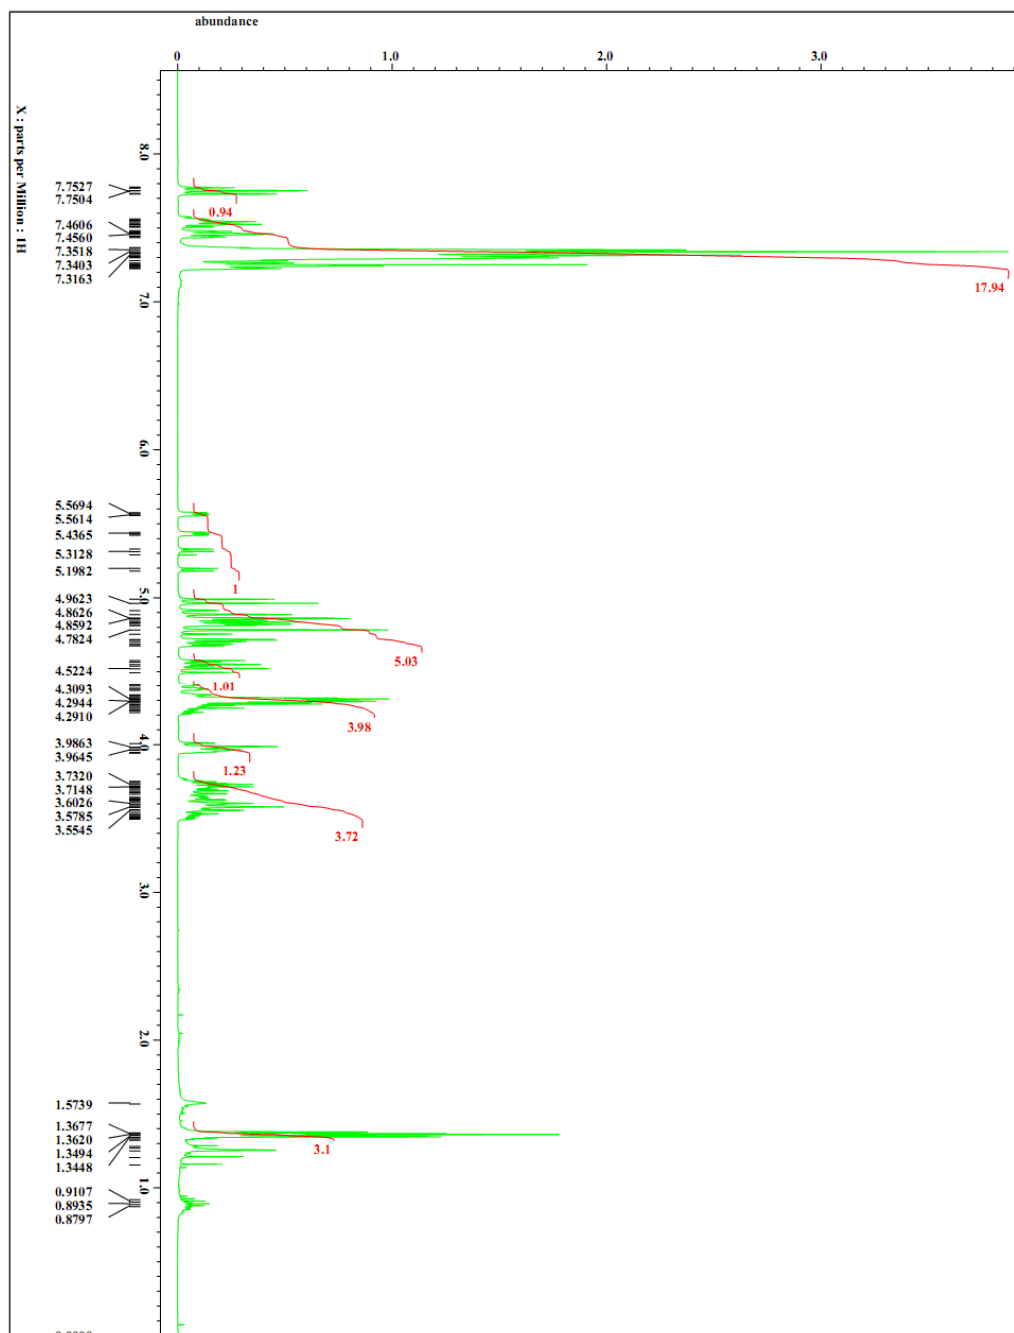

### $^{13}\text{C}$ NMR spectra of 20 in $\text{CDCl}_3$

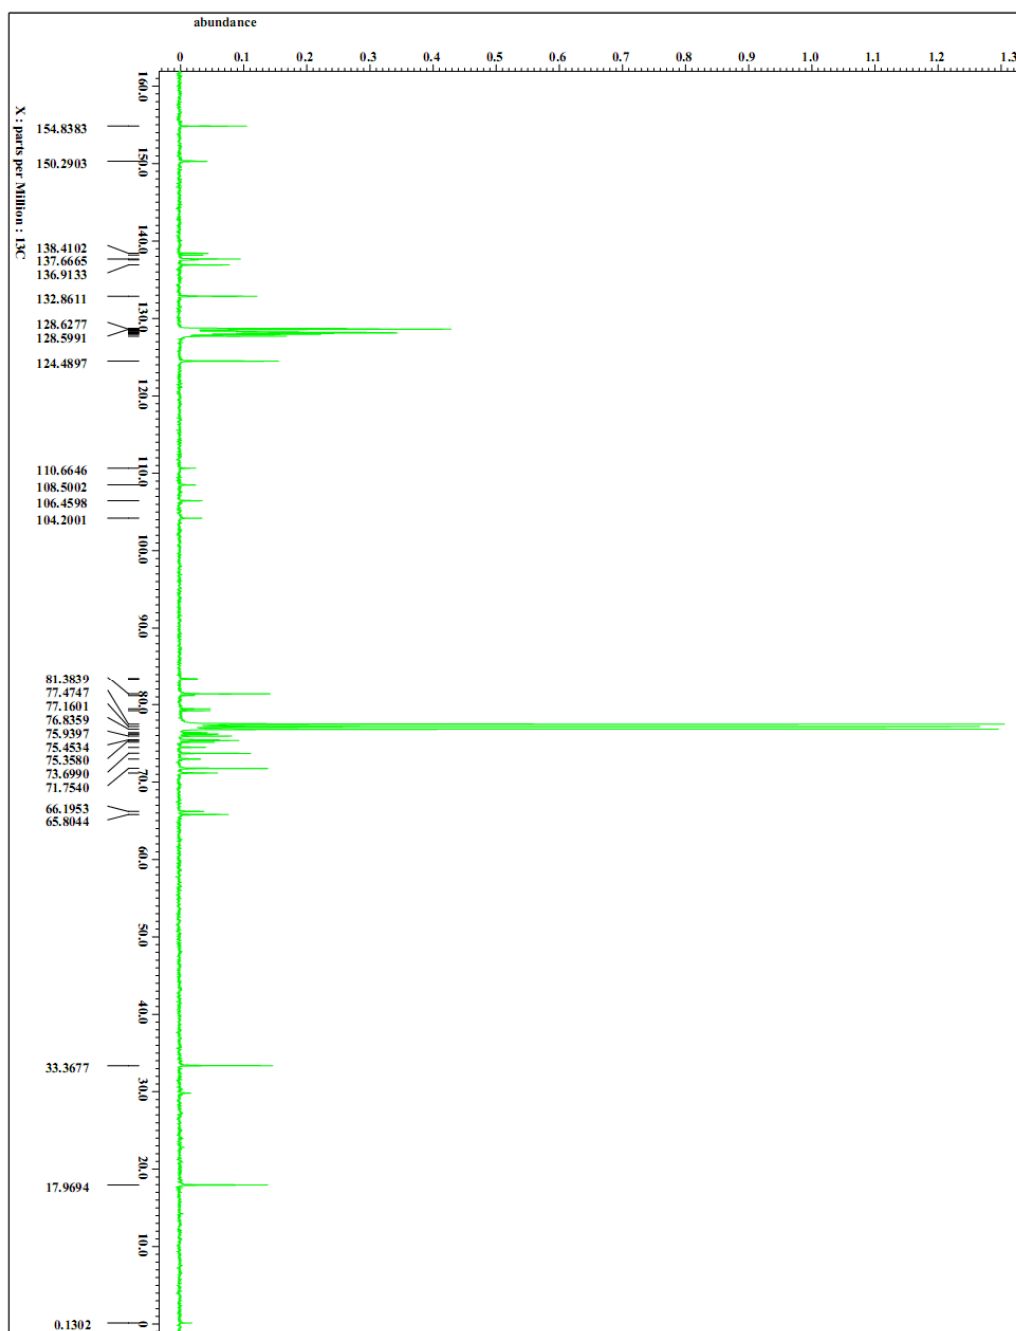

Supplement: b908404e.pdf [file b908404e.pdf]
